# Supplementary material for: Iron(iii)porphyrin electrocatalyzed enantioselective carbon-chloride bond cleavage of hexachlorocyclohexanes (HCHs): combined experimental investigation and theoretical calculations
Source: Royal Society of Chemistry journal article supplement (doi:10.1039/c8dt02510j), 2018-01-01
Supplement: c8dt02510j1.pdf [file c8dt02510j1.pdf]

## Iron(III)Porphyrin Electrocatalyzed Enantioselective Carbon-Chloride Bond Cleavage of Hexachlorocyclohexanes (HCHs): A Combined Experimental Investigation and Theoretical Calculation

Xu Liang<sup>\*,a,b</sup>, Minzhi Li<sup>a</sup>, John Mack<sup>\*,c</sup>, Kevin Lobb<sup>c</sup> and Weihua Zhu<sup>\*,a</sup>

*a. School of Chemistry and Chemical Engineering, Jiangsu University, Zhenjiang 212013, P. R. China.*

*b. State Key Laboratory of Coordination Chemistry, Nanjing University, Nanjing 210000, P. R. China.*

*c. Department of Chemistry, Rhodes University, Grahamstown 6140, South Africa.*

### Supplementary Information

#### Contents

|                                                                            |    |
|----------------------------------------------------------------------------|----|
| <b>Figure S1</b> GC-MS data .....                                          | 3  |
| <b>Figure S2</b> Reductive electrochemical measurements for <b>1</b> ..... | 4  |
| <b>Table S1</b> Summary of computational data .....                        | 5  |
| XYZ Coordinates of Structures .....                                        | 6  |
| Cl Abstraction Spin Density at Transition state .....                      | 6  |
| alphaa_2_1_ts .....                                                        | 6  |
| Cl Abstraction Transition States.....                                      | 6  |
| alphaa_2_1_ts .....                                                        | 6  |
| alphanb_1_1_ts .....                                                       | 8  |
| betaaa_1_ts .....                                                          | 11 |
| deltab_1_ts.....                                                           | 13 |
| deltab_2_ts.....                                                           | 15 |
| deltab_3_ts.....                                                           | 17 |
| gamma_1_ts .....                                                           | 19 |
| gamma_2_ts .....                                                           | 21 |
| gamma_3_ts .....                                                           | 24 |
| alphanb_b_full_ts .....                                                    | 26 |
| alphanb_c_full_ts .....                                                    | 28 |
| deltaa_a_full_ts.....                                                      | 30 |
| deltaa_b_full_ts.....                                                      | 32 |
| deltaa_c_full_ts .....                                                     | 35 |
| deltaa_d_full_ts.....                                                      | 37 |
| deltab_a_full_ts.....                                                      | 39 |

|                       |    |
|-----------------------|----|
| deltab_d_full_ts..... | 41 |
| gammaa_b_full_ts..... | 43 |
| Minima.....           | 46 |
| alphaa.....           | 46 |
| alphab.....           | 46 |
| betaa.....            | 47 |
| betab.....            | 48 |
| deltaa.....           | 48 |
| deltab.....           | 49 |
| gamma.....            | 50 |
| porph2.....           | 50 |

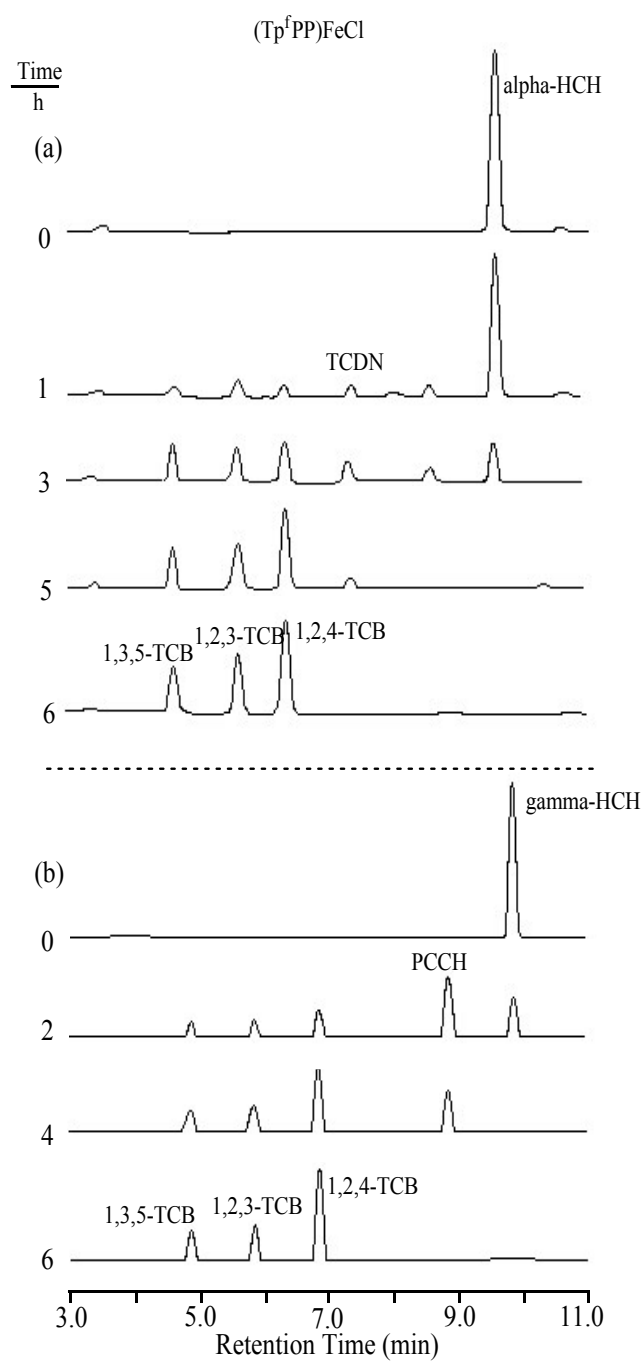

**Figure S1.** Retention times observed during the GC-MS analyses.

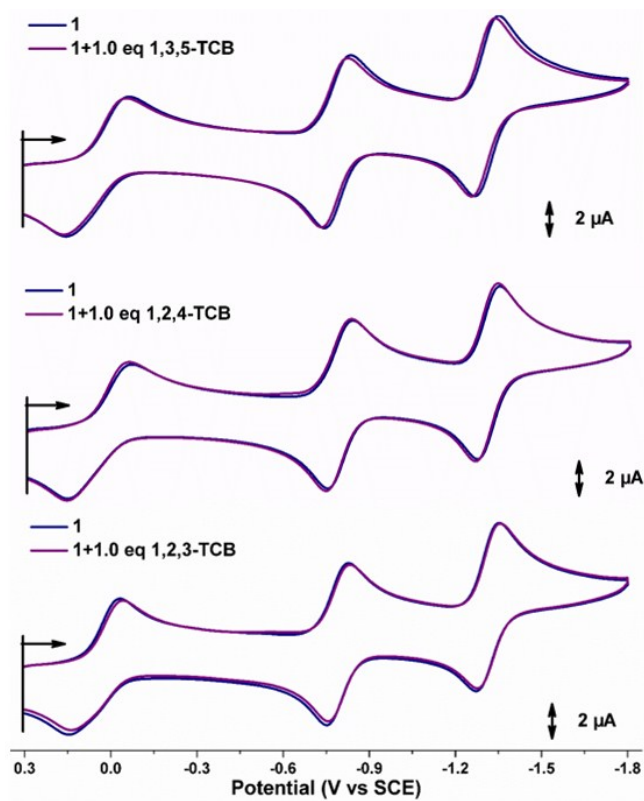

**Figure S2** Reductive electrochemical measurements for **1** in the absence (black) and/or presence 1.0 eq of 1,3,5-, 1,2,4- and 1,2,3-trichlorobenzene (TCB) in DMF containing 0.1 M TBAP.

## Summary of Computational Data

**Table S1.** Summary of computational data for the transition states that were identified.

| Filename         | G (Ha)   | E (Ha)   | Low Freq (cm <sup>-1</sup> ) | N <sub>imag</sub> | Comment                        |
|------------------|----------|----------|------------------------------|-------------------|--------------------------------|
| alphaa           | -0.04647 | -0.11218 | 48.49                        | 0                 | Most stable conformation       |
| alphab           | -0.04635 | -0.11097 | 18.19                        | 0                 |                                |
| betaa            | -0.04236 | -0.10698 | 36.50                        | 0                 | Most stable conformation       |
| betab            | -0.0415  | -0.10787 | 41.19                        | 0                 |                                |
| deltaa           | -0.03998 | -0.10623 | 46.46                        | 0                 |                                |
| deltab           | -0.04177 | -0.10691 | 39.17                        | 0                 | Most stable conformation       |
| gamma            | -0.04428 | -0.11045 | 53.48                        | 0                 | Only one conformation possible |
| porph2           | -0.83552 | -1.15018 | 5.95                         | 0                 | porphyrin                      |
| alphab_b_full_ts | -0.85741 | -1.26177 | -631.64                      | 1                 | Cl transfer TS                 |
| alphab_c_full_ts | -0.77286 | -1.18759 | -846.67                      | 1                 | Cl transfer TS                 |
| deltaa_a_full_ts | -0.84644 | -1.25407 | -650.96                      | 1                 | Cl transfer TS                 |
| deltaa_b_full_ts | -0.85137 | -1.26147 | -490.60                      | 1                 | Cl transfer TS                 |
| deltaa_c_full_ts | -0.82707 | -1.23371 | -665.04                      | 1                 | Cl transfer TS                 |
| deltaa_d_full_ts | -0.83069 | -1.2373  | -571.49                      | 1                 | Cl transfer TS                 |
| deltab_a_full_ts | -0.8307  | -1.23689 | -659.38                      | 1                 | Cl transfer TS                 |
| deltab_d_full_ts | -0.84107 | -1.24996 | -577.08                      | 1                 | Cl transfer TS                 |
| gammaa_b_full_ts | -0.84186 | -1.24998 | -585.26                      | 1                 | Cl transfer TS                 |
| alphaa_2_1_ts    | -0.86896 | -1.27654 | -90.51                       | 1                 | Cl abstraction TS              |
| alphab_1_1_ts    | -0.85336 | -1.25695 | -91.83                       | 1                 | Cl abstraction TS              |
| betaaa_1_ts      | -0.88472 | -1.28707 | -117.19                      | 1                 | Cl abstraction TS              |
| deltab_1_ts      | -0.88401 | -1.28843 | -101.58                      | 1                 | Cl abstraction TS              |
| deltab_2_ts      | -0.86491 | -1.27219 | -101.12                      | 1                 | Cl abstraction TS              |
| deltab_3_ts      | -0.88277 | -1.28612 | -103.79                      | 1                 | Cl abstraction TS              |
| gamma_1_ts       | -0.88847 | -1.29077 | -76.55                       | 1                 | Cl abstraction TS              |
| gamma_2_ts       | -0.87238 | -1.27765 | -109.43                      | 1                 | Cl abstraction TS              |
| gamma_3_ts       | -0.87733 | -1.28167 | -103.49                      | 1                 | Cl abstraction TS              |

## XYZ Coordinates of Structures

Cl Abstraction Spin Density at Transition state

alphaa\_2\_1\_ts

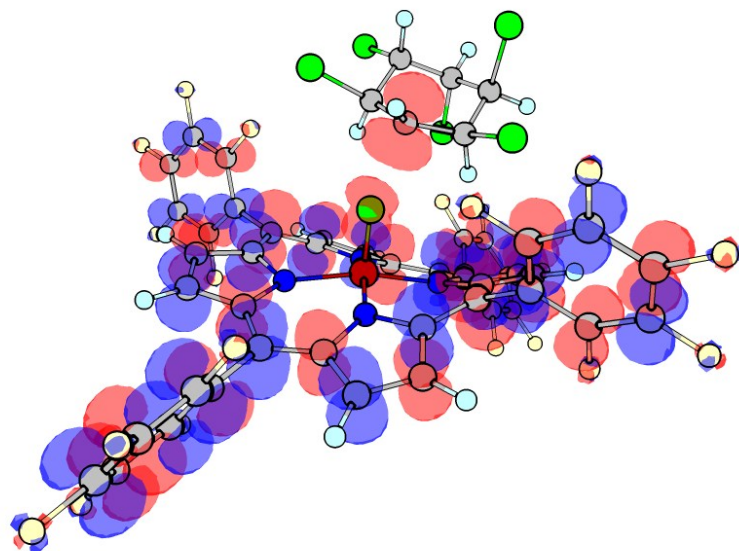

Cl Abstraction Transition States

alphaa\_2\_1\_ts

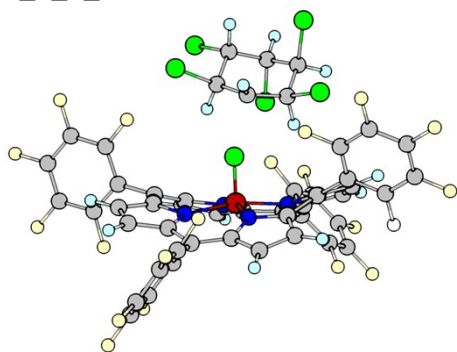

|   |          |          |          |
|---|----------|----------|----------|
| N | 0.81119  | -1.95910 | -1.10847 |
| C | 2.20788  | -1.90862 | -1.16772 |
| C | 2.74767  | -3.03276 | -1.83760 |
| C | 1.66680  | -3.85312 | -2.19331 |
| C | 0.49478  | -3.21719 | -1.70753 |
| C | 2.88688  | 2.74855  | -0.80817 |
| C | 3.58622  | 1.60259  | -0.50504 |
| C | 2.66369  | 0.47639  | -0.65704 |
| N | 1.34978  | 0.96220  | -0.89235 |
| C | 1.52092  | 2.36689  | -1.05088 |
| C | -2.08239 | 3.49704  | -1.07240 |
| C | -0.86115 | 2.73604  | -1.06036 |

|    |          |          |          |
|----|----------|----------|----------|
| N  | -1.11368 | 1.36821  | -0.71292 |
| C  | -2.50746 | 1.33461  | -0.44665 |
| C  | -3.08786 | 2.66558  | -0.63909 |
| C  | -3.82597 | -2.20094 | -0.30122 |
| C  | -2.89866 | -1.13199 | -0.32449 |
| N  | -1.64154 | -1.55622 | -0.78489 |
| C  | -1.85952 | -2.91499 | -1.15266 |
| C  | -3.17070 | -3.32476 | -0.83393 |
| C  | -3.26632 | 0.23939  | -0.07518 |
| C  | 0.43872  | 3.26135  | -1.23397 |
| C  | 3.03526  | -0.85278 | -0.61826 |
| C  | -0.82685 | -3.71528 | -1.72016 |
| C  | 0.68361  | 4.65778  | -1.49046 |
| C  | 4.34385  | -1.27672 | -0.11952 |
| C  | -1.14129 | -5.02044 | -2.27143 |
| C  | -4.63910 | 0.44893  | 0.41757  |
| C  | 1.46738  | 5.10468  | -2.60147 |
| C  | 1.70146  | 6.43810  | -2.87458 |
| C  | 1.16669  | 7.44877  | -2.03486 |
| C  | 0.40966  | 7.04887  | -0.90899 |
| C  | 0.19168  | 5.70762  | -0.65059 |
| C  | -4.93690 | 0.41528  | 1.79493  |
| C  | -6.24244 | 0.59830  | 2.28286  |
| C  | -7.29753 | 0.82058  | 1.38779  |
| C  | -7.03612 | 0.85309  | 0.01062  |
| C  | -5.72542 | 0.66496  | -0.45774 |
| C  | -2.09734 | -5.18299 | -3.30921 |
| C  | -2.41070 | -6.43875 | -3.85248 |
| C  | -1.76962 | -7.59405 | -3.37419 |
| C  | -0.82349 | -7.47335 | -2.34347 |
| C  | -0.52764 | -6.21122 | -1.80374 |
| C  | 4.44622  | -2.06468 | 1.05290  |
| C  | 5.68282  | -2.48434 | 1.56892  |
| C  | 6.87215  | -2.13006 | 0.91299  |
| C  | 6.80575  | -1.37320 | -0.26543 |
| C  | 5.55853  | -0.96930 | -0.77216 |
| H  | 3.78071  | -3.20769 | -2.03962 |
| H  | 1.71071  | -4.77548 | -2.72903 |
| H  | 3.24216  | 3.76220  | -0.84636 |
| H  | 4.61398  | 1.51644  | -0.22598 |
| H  | -2.14969 | 4.52851  | -1.36735 |
| H  | -4.11790 | 2.90747  | -0.48890 |
| H  | -4.83474 | -2.15908 | 0.04161  |
| Fe | -0.12697 | -0.31262 | -0.61457 |
| H  | -3.58131 | -4.30069 | -0.97042 |
| F  | 1.96645  | 4.18915  | -3.43580 |
| F  | 2.42351  | 6.79816  | -3.94058 |
| F  | 1.37537  | 8.73727  | -2.29800 |
| F  | -0.06882 | 7.98455  | -0.08269 |
| F  | -0.45631 | 5.37959  | 0.47285  |
| F  | -3.96225 | 0.20075  | 2.66899  |

|    |          |          |          |
|----|----------|----------|----------|
| F  | -6.48339 | 0.56137  | 3.59035  |
| F  | -8.53595 | 0.99621  | 1.83945  |
| F  | -8.03379 | 1.05781  | -0.84562 |
| F  | -5.51566 | 0.68738  | -1.76789 |
| F  | -2.70214 | -4.11636 | -3.81481 |
| F  | -3.30681 | -6.54272 | -4.82993 |
| F  | -2.05693 | -8.78548 | -3.88834 |
| F  | -0.22138 | -8.56204 | -1.87238 |
| F  | 0.32849  | -6.15509 | -0.79064 |
| F  | 3.34214  | -2.43344 | 1.69047  |
| F  | 5.73633  | -3.21398 | 2.67963  |
| F  | 8.04826  | -2.51545 | 1.39901  |
| F  | 7.92626  | -1.05141 | -0.90650 |
| F  | 5.53881  | -0.30332 | -1.92080 |
| C  | 1.92070  | 2.20167  | 3.92710  |
| C  | 0.59139  | 2.90709  | 4.21142  |
| C  | -0.46903 | 1.89374  | 4.65179  |
| C  | -0.70423 | 0.82593  | 3.57099  |
| C  | 0.57067  | 0.19327  | 3.11272  |
| C  | 1.75168  | 1.07862  | 2.88958  |
| H  | 2.69921  | 2.92783  | 3.58190  |
| Cl | 2.51661  | 1.53531  | 5.48916  |
| H  | 0.71515  | 3.70398  | 4.98583  |
| Cl | 0.09474  | 3.70877  | 2.69926  |
| H  | -0.17286 | 1.41570  | 5.62134  |
| Cl | -1.99049 | 2.78411  | 4.97907  |
| Cl | -1.74555 | -0.45824 | 4.31534  |
| H  | -1.30374 | 1.25846  | 2.72670  |
| H  | 0.78243  | -0.80714 | 3.48673  |
| Cl | 0.03302  | -0.40016 | 1.00929  |
| Cl | 3.26826  | 0.10104  | 2.94360  |
| H  | 1.73776  | 1.55595  | 1.86815  |

alphan\_1\_1\_ts

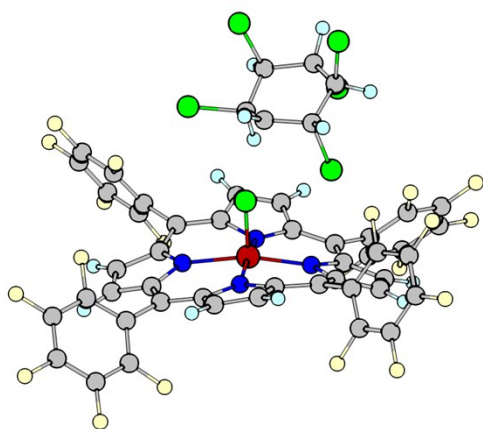

|   |         |          |          |
|---|---------|----------|----------|
| N | 0.73595 | -1.65594 | -0.97641 |
| C | 2.13633 | -1.81640 | -1.22866 |
| C | 2.45330 | -3.16629 | -1.56456 |
| C | 1.28396 | -3.90018 | -1.43405 |



|   |          |          |          |
|---|----------|----------|----------|
| C | 0.25188  | -2.98036 | -1.04554 |
| C | 2.60556  | 2.70531  | -0.10984 |
| C | 3.44202  | 1.62825  | -0.33468 |
| C | 2.60873  | 0.54322  | -0.77504 |
| N | 1.24397  | 0.90668  | -0.78633 |
| C | 1.26155  | 2.28763  | -0.46270 |
| C | -2.08882 | 3.71631  | -1.48433 |
| C | -1.14499 | 2.77847  | -0.95443 |
| N | -1.65928 | 1.49007  | -0.93446 |
| C | -2.98466 | 1.64840  | -1.38174 |
| C | -3.24754 | 2.99670  | -1.76245 |
| C | -4.35126 | -1.86030 | -0.88743 |
| C | -3.47395 | -0.74139 | -1.12848 |
| N | -2.11342 | -1.10997 | -0.96931 |
| C | -2.17808 | -2.50871 | -0.75554 |
| C | -3.54702 | -2.95554 | -0.63445 |
| C | -3.91292 | 0.56622  | -1.41403 |
| C | 0.17094  | 3.16296  | -0.51610 |
| C | 3.06177  | -0.76212 | -1.08135 |
| C | -1.07715 | -3.38245 | -0.77097 |
| C | 0.33936  | 4.57228  | -0.16146 |
| C | 4.48975  | -1.01593 | -1.19531 |
| C | -1.30491 | -4.81868 | -0.54960 |
| C | -5.30969 | 0.82198  | -1.70923 |
| C | 1.20866  | 5.44083  | -0.86548 |
| C | 1.36918  | 6.79218  | -0.51615 |
| C | 0.63725  | 7.33345  | 0.55129  |
| C | -0.25686 | 6.50958  | 1.25507  |
| C | -0.40069 | 5.15960  | 0.89804  |
| C | -6.08554 | 1.75645  | -0.96921 |
| C | -7.43131 | 2.01978  | -1.26401 |
| C | -8.07062 | 1.34162  | -2.31595 |
| C | -7.34081 | 0.40315  | -3.06448 |
| C | -5.99261 | 0.15799  | -2.76460 |
| C | -1.96349 | -5.63553 | -1.49588 |
| C | -2.17547 | -7.00816 | -1.28192 |
| C | -1.71785 | -7.61221 | -0.10181 |
| C | -1.05062 | -6.83204 | 0.85457  |
| C | -0.85171 | -5.46011 | 0.62617  |
| C | 5.16338  | -1.95113 | -0.36612 |
| C | 6.53822  | -2.20668 | -0.48310 |
| C | 7.30549  | -1.51620 | -1.43574 |
| C | 6.67708  | -0.57297 | -2.26453 |
| C | 5.29907  | -0.33605 | -2.14217 |
| H | 3.41379  | -3.52399 | -1.86000 |
| H | 1.15061  | -4.94434 | -1.59956 |
| H | 2.87693  | 3.67334  | 0.25161  |
| H | 4.50069  | 1.57854  | -0.19745 |
| H | -1.91669 | 4.75579  | -1.64034 |
| H | -4.15503 | 3.36583  | -2.18296 |
| H | -5.41937 | -1.81958 | -0.89355 |

|    |          |          |          |
|----|----------|----------|----------|
| Fe | -0.43703 | -0.11691 | -0.71693 |
| H  | -3.85569 | -3.94974 | -0.39703 |
| F  | 1.87905  | 4.99025  | -1.91965 |
| F  | 2.20445  | 7.56844  | -1.20276 |
| F  | 0.78436  | 8.61129  | 0.88908  |
| F  | -0.95826 | 7.01723  | 2.26531  |
| F  | -1.25036 | 4.41737  | 1.59396  |
| F  | -5.54647 | 2.37904  | 0.07118  |
| F  | -8.11832 | 2.89982  | -0.53946 |
| F  | -9.34765 | 1.58293  | -2.59710 |
| F  | -7.93394 | -0.24035 | -4.06733 |
| F  | -5.33449 | -0.70385 | -3.53078 |
| F  | -2.38750 | -5.10695 | -2.63701 |
| F  | -2.80251 | -7.74241 | -2.19761 |
| F  | -1.91379 | -8.91079 | 0.10810  |
| F  | -0.61552 | -7.39750 | 1.97760  |
| F  | -0.22882 | -4.75218 | 1.55909  |
| F  | 4.49191  | -2.58924 | 0.58431  |
| F  | 7.12794  | -3.09206 | 0.31666  |
| F  | 8.60955  | -1.75076 | -1.54941 |
| F  | 7.39412  | 0.08435  | -3.17283 |
| F  | 4.74257  | 0.53992  | -2.96999 |
| C  | 0.67355  | 0.13675  | 3.35788  |
| C  | 1.40846  | 1.40700  | 3.18702  |
| C  | 2.49570  | 1.56083  | 4.26380  |
| C  | 3.36664  | 0.31267  | 4.45734  |
| C  | 2.69515  | -1.05286 | 4.25710  |
| C  | 1.48839  | -1.09468 | 3.30077  |
| H  | -0.33335 | 0.11788  | 3.73912  |
| Cl | -0.52698 | -0.07894 | 1.09542  |
| H  | 1.87258  | 1.46644  | 2.15566  |
| Cl | 0.31547  | 2.82103  | 3.33769  |
| H  | 3.12623  | 2.45835  | 4.03752  |
| Cl | 1.71406  | 1.92251  | 5.85000  |
| Cl | 4.73004  | 0.44212  | 3.27976  |
| H  | 3.85946  | 0.34838  | 5.46601  |
| H  | 3.45704  | -1.81875 | 3.95096  |
| Cl | 2.11404  | -1.61961 | 5.88246  |
| Cl | 2.17401  | -1.31200 | 1.65198  |
| H  | 0.86231  | -2.00434 | 3.49113  |

betaaa\_1\_ts

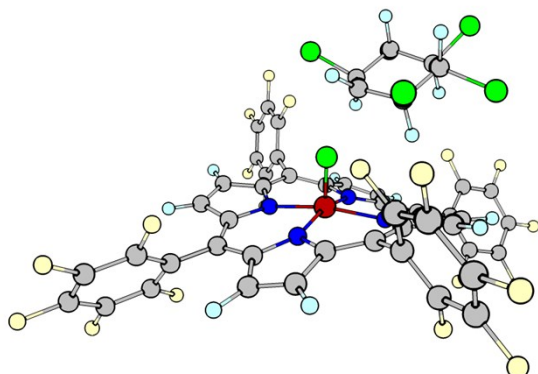

|   |          |          |          |
|---|----------|----------|----------|
| N | 0.78276  | -1.95526 | -1.08193 |
| C | 2.20224  | -1.95067 | -1.06542 |
| C | 2.72568  | -3.19565 | -1.59821 |
| C | 1.64514  | -3.97736 | -1.95714 |
| C | 0.46136  | -3.25193 | -1.59909 |
| C | 2.87774  | 2.70197  | -0.49989 |
| C | 3.58301  | 1.51702  | -0.31769 |
| C | 2.65917  | 0.43859  | -0.52123 |
| N | 1.34523  | 0.92847  | -0.71523 |
| C | 1.52039  | 2.33417  | -0.76324 |
| C | -2.06446 | 3.52463  | -1.00623 |
| C | -0.87264 | 2.73500  | -0.91385 |
| N | -1.17402 | 1.36702  | -0.65962 |
| C | -2.58207 | 1.36267  | -0.54002 |
| C | -3.12943 | 2.67067  | -0.74257 |
| C | -3.93848 | -2.19942 | -0.53932 |
| C | -2.99605 | -1.09070 | -0.51417 |
| N | -1.69142 | -1.53699 | -0.85956 |
| C | -1.89762 | -2.90365 | -1.23085 |
| C | -3.25865 | -3.30360 | -1.01023 |
| C | -3.39018 | 0.22183  | -0.28012 |
| C | 0.44510  | 3.22675  | -0.96114 |
| C | 3.04547  | -0.92011 | -0.63832 |
| C | -0.85820 | -3.75502 | -1.66536 |
| C | 0.71248  | 4.64714  | -1.17678 |
| C | 4.46179  | -1.25482 | -0.40096 |
| C | -1.13911 | -5.10128 | -2.10887 |
| C | -4.77885 | 0.47409  | 0.15309  |
| C | 1.41079  | 5.10173  | -2.32091 |
| C | 1.67364  | 6.46359  | -2.54483 |
| C | 1.23891  | 7.42450  | -1.61827 |
| C | 0.54977  | 7.00744  | -0.46930 |
| C | 0.30215  | 5.64045  | -0.25799 |
| C | -5.10613 | 0.61316  | 1.51642  |
| C | -6.42145 | 0.85938  | 1.94703  |
| C | -7.45354 | 0.97402  | 1.00577  |

|    |          |          |          |
|----|----------|----------|----------|
| C  | -7.15972 | 0.84023  | -0.35878 |
| C  | -5.83910 | 0.59331  | -0.76953 |
| C  | -2.01958 | -5.38287 | -3.20016 |
| C  | -2.29002 | -6.66272 | -3.64196 |
| C  | -1.69148 | -7.78334 | -3.01064 |
| C  | -0.82515 | -7.54704 | -1.91510 |
| C  | -0.57153 | -6.25826 | -1.48700 |
| C  | 4.85663  | -1.98158 | 0.74324  |
| C  | 6.20136  | -2.30176 | 0.99811  |
| C  | 7.19819  | -1.90302 | 0.09566  |
| C  | 6.83675  | -1.19296 | -1.05853 |
| C  | 5.48681  | -0.88384 | -1.29778 |
| H  | 3.76306  | -3.42856 | -1.70422 |
| H  | 1.64678  | -4.94854 | -2.41554 |
| H  | 3.25406  | 3.70038  | -0.44781 |
| H  | 4.61930  | 1.41544  | -0.07781 |
| H  | -2.10720 | 4.56708  | -1.23481 |
| H  | -4.16685 | 2.92360  | -0.71147 |
| H  | -4.96745 | -2.13425 | -0.26013 |
| Fe | -0.17865 | -0.34443 | -0.59157 |
| H  | -3.63066 | -4.29647 | -1.18344 |
| F  | 1.82180  | 4.22529  | -3.22730 |
| F  | 2.32771  | 6.85056  | -3.63608 |
| F  | 1.47937  | 8.71498  | -1.82598 |
| F  | 0.14253  | 7.90870  | 0.41954  |
| F  | -0.31834 | 5.28290  | 0.86031  |
| F  | -4.15080 | 0.50832  | 2.43105  |
| F  | -6.69294 | 0.98433  | 3.24295  |
| F  | -8.70074 | 1.20831  | 1.40273  |
| F  | -8.13452 | 0.94939  | -1.25748 |
| F  | -5.59282 | 0.47320  | -2.06750 |
| F  | -2.57838 | -4.35623 | -3.84771 |
| F  | -3.10823 | -6.86551 | -4.68051 |
| F  | -1.93878 | -9.02145 | -3.43479 |
| F  | -0.27459 | -8.59172 | -1.28671 |
| F  | 0.19892  | -6.08928 | -0.40716 |
| F  | 3.93862  | -2.37926 | 1.61398  |
| F  | 6.53549  | -2.97939 | 2.09257  |
| F  | 8.47322  | -2.19762 | 0.33002  |
| F  | 7.77498  | -0.82055 | -1.92512 |
| F  | 5.17971  | -0.23360 | -2.41304 |
| C  | 1.93691  | 1.99734  | 4.09994  |
| C  | 0.72379  | 2.92680  | 4.20114  |
| C  | -0.54034 | 2.14778  | 4.57636  |
| C  | -0.82436 | 1.01903  | 3.56641  |
| C  | 0.37794  | 0.18918  | 3.28480  |
| C  | 1.69599  | 0.85445  | 3.09382  |
| Cl | 3.33061  | 2.97913  | 3.54360  |
| H  | 2.21225  | 1.58999  | 5.10546  |
| Cl | 1.04701  | 4.11581  | 5.51269  |
| H  | 0.57834  | 3.51600  | 3.25762  |

|    |          |          |         |
|----|----------|----------|---------|
| H  | -0.46671 | 1.74179  | 5.61663 |
| Cl | -1.91529 | 3.29805  | 4.56758 |
| Cl | -2.09213 | -0.03773 | 4.30823 |
| H  | -1.28269 | 1.43823  | 2.63027 |
| H  | 0.37762  | -0.83928 | 3.63619 |
| Cl | -0.09338 | -0.48577 | 1.07398 |
| Cl | 3.00054  | -0.36647 | 3.37555 |
| H  | 1.84660  | 1.22208  | 2.04027 |

deltab\_1\_ts

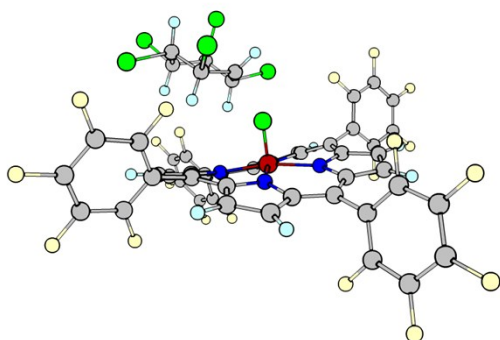

|   |          |          |          |
|---|----------|----------|----------|
| N | 0.89219  | -2.08404 | -1.04519 |
| C | 2.30395  | -2.14511 | -0.98362 |
| C | 2.77948  | -3.46789 | -1.26439 |
| C | 1.66967  | -4.24626 | -1.57752 |
| C | 0.52353  | -3.40120 | -1.43692 |
| C | 3.07548  | 2.53255  | -1.29926 |
| C | 3.77519  | 1.35496  | -1.13340 |
| C | 2.80003  | 0.29765  | -0.92433 |
| N | 1.48352  | 0.82564  | -0.91773 |
| C | 1.68114  | 2.22263  | -1.14293 |
| C | -1.75077 | 3.55999  | -0.31316 |
| C | -0.63138 | 2.72843  | -0.64937 |
| N | -0.95922 | 1.34545  | -0.52038 |
| C | -2.32737 | 1.35735  | -0.14453 |
| C | -2.78653 | 2.72151  | 0.04961  |
| C | -3.88270 | -2.02439 | -0.80772 |
| C | -2.86645 | -1.05162 | -0.52069 |
| N | -1.57888 | -1.55322 | -0.81893 |
| C | -1.84232 | -2.86172 | -1.31009 |
| C | -3.24554 | -3.14925 | -1.31641 |
| C | -3.17802 | 0.25325  | -0.05351 |
| C | 0.65542  | 3.18436  | -1.01489 |
| C | 3.17026  | -1.03997 | -0.78148 |
| C | -0.81995 | -3.77643 | -1.62687 |
| C | 0.94168  | 4.59598  | -1.17108 |
| C | 4.58924  | -1.34134 | -0.50496 |
| C | -1.15717 | -5.11270 | -2.12085 |
| C | -4.55648 | 0.45615  | 0.43500  |

|    |          |          |          |
|----|----------|----------|----------|
| C  | 1.38430  | 5.15928  | -2.40478 |
| C  | 1.64189  | 6.50465  | -2.57071 |
| C  | 1.47900  | 7.40734  | -1.48399 |
| C  | 1.06504  | 6.88330  | -0.23772 |
| C  | 0.81654  | 5.53100  | -0.09541 |
| C  | -4.96066 | -0.00771 | 1.70457  |
| C  | -6.26942 | 0.17283  | 2.18491  |
| C  | -7.22151 | 0.82651  | 1.38959  |
| C  | -6.85553 | 1.28533  | 0.11575  |
| C  | -5.54314 | 1.09300  | -0.34844 |
| C  | -1.72594 | -5.30649 | -3.40038 |
| C  | -2.05278 | -6.58359 | -3.88710 |
| C  | -1.81369 | -7.71780 | -3.09615 |
| C  | -1.25344 | -7.55945 | -1.81980 |
| C  | -0.93857 | -6.27417 | -1.34677 |
| C  | 5.06054  | -1.44170 | 0.81976  |
| C  | 6.40384  | -1.73426 | 1.11244  |
| C  | 7.31807  | -1.93361 | 0.06860  |
| C  | 6.87935  | -1.83827 | -1.25961 |
| C  | 5.53255  | -1.54509 | -1.53245 |
| H  | 3.80141  | -3.77847 | -1.25243 |
| H  | 1.65724  | -5.27344 | -1.86912 |
| H  | 3.45784  | 3.51932  | -1.48313 |
| H  | 4.83385  | 1.21471  | -1.16481 |
| H  | -1.74538 | 4.63330  | -0.35639 |
| H  | -3.75906 | 3.00340  | 0.39127  |
| H  | -4.93276 | -1.88692 | -0.66515 |
| Fe | -0.01076 | -0.38878 | -0.59141 |
| H  | -3.69292 | -4.06173 | -1.64472 |
| F  | 1.52702  | 4.34740  | -3.45649 |
| F  | 2.03656  | 6.98330  | -3.75560 |
| F  | 1.71142  | 8.70969  | -1.63786 |
| F  | 0.93785  | 7.70879  | 0.80662  |
| F  | 0.49527  | 5.06503  | 1.11924  |
| F  | -4.08873 | -0.64279 | 2.47633  |
| F  | -6.61132 | -0.27447 | 3.38947  |
| F  | -8.46131 | 1.00372  | 1.83541  |
| F  | -7.75672 | 1.89376  | -0.65046 |
| F  | -5.24076 | 1.51363  | -1.56984 |
| F  | -1.95164 | -4.25843 | -4.18119 |
| F  | -2.58338 | -6.72513 | -5.09825 |
| F  | -2.11645 | -8.92954 | -3.55073 |
| F  | -1.03016 | -8.62786 | -1.05980 |
| F  | -0.43779 | -6.16129 | -0.12262 |
| F  | 4.21762  | -1.25982 | 1.82810  |
| F  | 6.81321  | -1.82478 | 2.37457  |
| F  | 8.59042  | -2.21249 | 0.33533  |
| F  | 7.74153  | -2.02701 | -2.25511 |
| F  | 5.14803  | -1.46098 | -2.79967 |
| C  | 1.04939  | 2.69943  | 3.86347  |
| C  | -0.42551 | 3.07153  | 4.03056  |

|    |          |          |         |
|----|----------|----------|---------|
| C  | -1.27053 | 1.85463  | 4.42032 |
| C  | -1.09839 | 0.70374  | 3.40772 |
| C  | 0.33264  | 0.42124  | 3.08622 |
| C  | 1.19539  | 1.60354  | 2.79336 |
| H  | 1.66783  | 3.59744  | 3.60831 |
| Cl | 1.67360  | 2.07379  | 5.42860 |
| Cl | -0.55058 | 4.30588  | 5.32547 |
| H  | -0.81464 | 3.55175  | 3.09024 |
| H  | -1.03165 | 1.51690  | 5.46100 |
| Cl | -2.99617 | 2.36074  | 4.42616 |
| Cl | -1.81563 | -0.77726 | 4.16804 |
| H  | -1.70840 | 0.90626  | 2.48566 |
| H  | 0.80513  | -0.41284 | 3.59885 |
| Cl | 0.16011  | -0.51739 | 1.04523 |
| Cl | 2.92377  | 1.10858  | 2.76770 |
| H  | 0.98708  | 2.05604  | 1.78283 |

deltab\_2\_ts

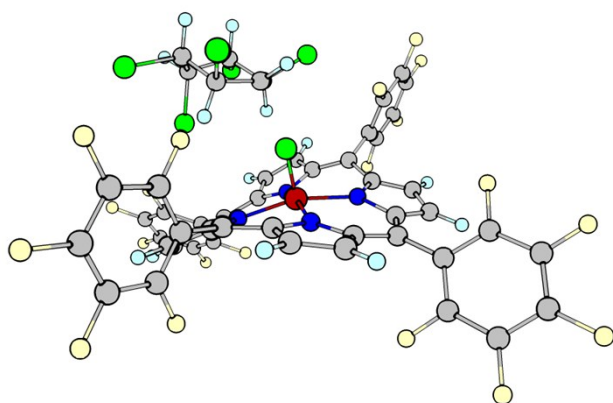

|   |          |          |          |
|---|----------|----------|----------|
| N | 0.80346  | -1.93977 | -1.10206 |
| C | 2.20072  | -1.88391 | -1.13270 |
| C | 2.75622  | -2.99884 | -1.80527 |
| C | 1.68471  | -3.81727 | -2.19301 |
| C | 0.50106  | -3.19072 | -1.72290 |
| C | 2.85109  | 2.77087  | -0.79862 |
| C | 3.54570  | 1.63591  | -0.44822 |
| C | 2.63831  | 0.49947  | -0.61527 |
| N | 1.32861  | 0.97427  | -0.89546 |
| C | 1.49447  | 2.37665  | -1.07484 |
| C | -2.11239 | 3.49314  | -1.07802 |
| C | -0.88858 | 2.73639  | -1.08786 |
| N | -1.13055 | 1.37129  | -0.72231 |
| C | -2.51791 | 1.33430  | -0.42612 |
| C | -3.10408 | 2.66411  | -0.60932 |
| C | -3.83214 | -2.19716 | -0.34557 |
| C | -2.90034 | -1.13218 | -0.32985 |
| N | -1.64135 | -1.54938 | -0.79095 |

|    |          |          |          |
|----|----------|----------|----------|
| C  | -1.86020 | -2.89710 | -1.19758 |
| C  | -3.17643 | -3.30893 | -0.90345 |
| C  | -3.26411 | 0.23372  | -0.04335 |
| C  | 0.40868  | 3.26179  | -1.28350 |
| C  | 3.01295  | -0.82890 | -0.55657 |
| C  | -0.82051 | -3.68729 | -1.76715 |
| C  | 0.64745  | 4.65194  | -1.57205 |
| C  | 4.30412  | -1.25782 | -0.02360 |
| C  | -1.12833 | -4.98027 | -2.34939 |
| C  | -4.62137 | 0.42866  | 0.49330  |
| C  | 1.42578  | 5.07767  | -2.69476 |
| C  | 1.63600  | 6.40654  | -3.00818 |
| C  | 1.08581  | 7.43210  | -2.19738 |
| C  | 0.34695  | 7.05365  | -1.05201 |
| C  | 0.15308  | 5.71716  | -0.75275 |
| C  | -4.88328 | 0.32937  | 1.87525  |
| C  | -6.17310 | 0.49878  | 2.40747  |
| C  | -7.25025 | 0.77251  | 1.55374  |
| C  | -7.02611 | 0.86751  | 0.17287  |
| C  | -5.73055 | 0.69117  | -0.34020 |
| C  | -2.06982 | -5.12005 | -3.40378 |
| C  | -2.37689 | -6.36382 | -3.97726 |
| C  | -1.74406 | -7.52974 | -3.51393 |
| C  | -0.81277 | -7.43174 | -2.46743 |
| C  | -0.52326 | -6.18151 | -1.89749 |
| C  | 4.36759  | -2.10008 | 1.11506  |
| C  | 5.58568  | -2.52775 | 1.66628  |
| C  | 6.79817  | -2.12944 | 1.08104  |
| C  | 6.77233  | -1.32380 | -0.06622 |
| C  | 5.54294  | -0.91367 | -0.61062 |
| H  | 3.79367  | -3.16866 | -1.98856 |
| H  | 1.74209  | -4.73234 | -2.73983 |
| H  | 3.19964  | 3.78717  | -0.83805 |
| H  | 4.56121  | 1.56592  | -0.12276 |
| H  | -2.19105 | 4.52127  | -1.38177 |
| H  | -4.12890 | 2.90788  | -0.43014 |
| H  | -4.84464 | -2.15986 | -0.01363 |
| Fe | -0.13830 | -0.30005 | -0.61296 |
| H  | -3.59050 | -4.27839 | -1.07175 |
| F  | 1.94297  | 4.14578  | -3.49929 |
| F  | 2.35008  | 6.74711  | -4.08590 |
| F  | 1.26700  | 8.71554  | -2.50258 |
| F  | -0.13593 | 8.00574  | -0.24733 |
| F  | -0.46601 | 5.40813  | 0.39187  |
| F  | -3.88806 | 0.06298  | 2.71147  |
| F  | -6.37851 | 0.40054  | 3.71788  |
| F  | -8.47409 | 0.93670  | 2.04750  |
| F  | -8.04515 | 1.11863  | -0.64494 |
| F  | -5.55908 | 0.76701  | -1.65400 |
| F  | -2.66628 | -4.04235 | -3.89561 |
| F  | -3.25917 | -6.44632 | -4.96926 |



|    |          |          |          |
|----|----------|----------|----------|
| F  | -2.02538 | -8.70988 | -4.05668 |
| F  | -0.21899 | -8.53088 | -2.01016 |
| F  | 0.31743  | -6.14798 | -0.87050 |
| F  | 3.24197  | -2.51558 | 1.68259  |
| F  | 5.60065  | -3.30717 | 2.74412  |
| F  | 7.95699  | -2.52097 | 1.60240  |
| F  | 7.91506  | -0.96349 | -0.64457 |
| F  | 5.56677  | -0.21124 | -1.73731 |
| C  | 1.99238  | 2.08356  | 3.95331  |
| C  | 0.71389  | 2.92972  | 3.99149  |
| C  | -0.40784 | 2.04332  | 4.54629  |
| C  | -0.68561 | 0.86587  | 3.59701  |
| C  | 0.55157  | 0.15103  | 3.16139  |
| C  | 1.83448  | 0.89733  | 2.98613  |
| Cl | 3.35120  | 3.12618  | 3.43967  |
| H  | 2.24768  | 1.72470  | 4.98217  |
| H  | 0.85376  | 3.84410  | 4.61889  |
| Cl | 0.30613  | 3.48222  | 2.35296  |
| H  | -0.14031 | 1.67435  | 5.56823  |
| Cl | -1.87991 | 3.04023  | 4.74998  |
| Cl | -1.72490 | -0.31103 | 4.51633  |
| H  | -1.31478 | 1.21149  | 2.73368  |
| H  | 0.64387  | -0.88771 | 3.47961  |
| Cl | 0.01744  | -0.38173 | 1.01646  |
| Cl | 3.20847  | -0.24015 | 3.34815  |
| H  | 2.00449  | 1.23845  | 1.92796  |

deltab\_3\_ts

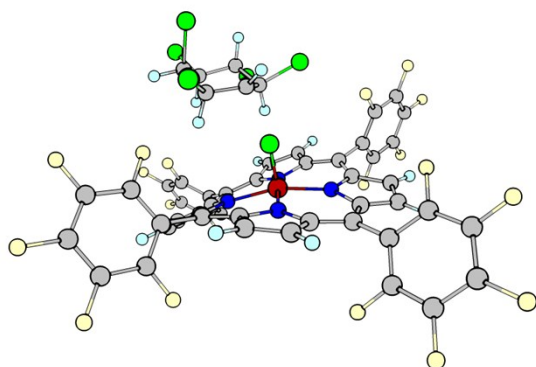

|   |         |          |          |
|---|---------|----------|----------|
| N | 0.78502 | -1.96084 | -1.08872 |
| C | 2.20474 | -1.94919 | -1.10554 |
| C | 2.72150 | -3.18473 | -1.66502 |
| C | 1.63640 | -3.97045 | -2.00186 |
| C | 0.45854 | -3.25647 | -1.60461 |
| C | 2.88562 | 2.69340  | -0.45112 |
| C | 3.59419 | 1.50554  | -0.31268 |
| C | 2.66659 | 0.43167  | -0.52729 |
| N | 1.35021 | 0.92487  | -0.69122 |

|    |          |          |          |
|----|----------|----------|----------|
| C  | 1.52385  | 2.33147  | -0.70583 |
| C  | -2.06055 | 3.51464  | -0.97602 |
| C  | -0.86997 | 2.72963  | -0.85315 |
| N  | -1.17243 | 1.35867  | -0.61608 |
| C  | -2.58200 | 1.34904  | -0.53361 |
| C  | -3.12960 | 2.65358  | -0.75248 |
| C  | -3.92574 | -2.22719 | -0.45551 |
| C  | -2.99705 | -1.10500 | -0.48277 |
| N  | -1.69159 | -1.54979 | -0.82869 |
| C  | -1.89208 | -2.92449 | -1.17327 |
| C  | -3.24334 | -3.33465 | -0.91171 |
| C  | -3.39977 | 0.20980  | -0.28493 |
| C  | 0.44778  | 3.22735  | -0.87555 |
| C  | 3.05186  | -0.92323 | -0.67588 |
| C  | -0.85871 | -3.77053 | -1.63070 |
| C  | 0.70815  | 4.65356  | -1.04977 |
| C  | 4.47283  | -1.25756 | -0.46152 |
| C  | -1.14118 | -5.11986 | -2.06090 |
| C  | -4.79816 | 0.48138  | 0.09557  |
| C  | 1.43548  | 5.14368  | -2.16177 |
| C  | 1.69126  | 6.51281  | -2.34472 |
| C  | 1.21895  | 7.44761  | -1.40943 |
| C  | 0.49883  | 6.99630  | -0.29275 |
| C  | 0.25944  | 5.62234  | -0.12199 |
| C  | -5.13771 | 0.89808  | 1.39947  |
| C  | -6.46375 | 1.17020  | 1.77774  |
| C  | -7.49879 | 1.03177  | 0.84235  |
| C  | -7.19412 | 0.62675  | -0.46552 |
| C  | -5.86193 | 0.36215  | -0.82550 |
| C  | -2.05798 | -5.41328 | -3.11907 |
| C  | -2.33026 | -6.69698 | -3.54903 |
| C  | -1.69652 | -7.80963 | -2.93899 |
| C  | -0.79299 | -7.56217 | -1.87663 |
| C  | -0.53812 | -6.26989 | -1.45939 |
| C  | 4.88817  | -1.95954 | 0.69022  |
| C  | 6.23670  | -2.28206 | 0.92143  |
| C  | 7.21465  | -1.90809 | -0.01167 |
| C  | 6.83190  | -1.21860 | -1.17131 |
| C  | 5.47860  | -0.90661 | -1.38652 |
| H  | 3.75722  | -3.40966 | -1.80069 |
| H  | 1.63201  | -4.93764 | -2.46860 |
| H  | 3.26179  | 3.69055  | -0.37563 |
| H  | 4.63485  | 1.39718  | -0.09493 |
| H  | -2.10171 | 4.55760  | -1.20234 |
| H  | -4.16910 | 2.89940  | -0.76055 |
| H  | -4.94701 | -2.17024 | -0.14761 |
| Fe | -0.17250 | -0.35568 | -0.57197 |
| H  | -3.60635 | -4.33637 | -1.05059 |
| F  | 1.87944  | 4.29463  | -3.07863 |
| F  | 2.37351  | 6.93209  | -3.40628 |
| F  | 1.45245  | 8.74480  | -1.57895 |

|    |          |          |          |
|----|----------|----------|----------|
| F  | 0.05442  | 7.87141  | 0.60435  |
| F  | -0.39216 | 5.23393  | 0.96865  |
| F  | -4.18223 | 1.04060  | 2.30927  |
| F  | -6.74275 | 1.55785  | 3.01909  |
| F  | -8.75656 | 1.28557  | 1.19042  |
| F  | -8.16984 | 0.50212  | -1.36085 |
| F  | -5.60746 | 0.00213  | -2.07650 |
| F  | -2.65061 | -4.39440 | -3.74839 |
| F  | -3.18352 | -6.91038 | -4.55666 |
| F  | -1.94574 | -9.05103 | -3.35207 |
| F  | -0.20821 | -8.59973 | -1.26794 |
| F  | 0.26897  | -6.09131 | -0.40846 |
| F  | 3.98693  | -2.32900 | 1.59008  |
| F  | 6.59221  | -2.93851 | 2.02191  |
| F  | 8.49296  | -2.20590 | 0.19965  |
| F  | 7.75279  | -0.86729 | -2.06494 |
| F  | 5.14918  | -0.27058 | -2.50359 |
| C  | 1.96931  | 1.97060  | 4.05872  |
| C  | 0.77225  | 2.92403  | 4.09673  |
| C  | -0.51014 | 2.18929  | 4.49038  |
| C  | -0.80104 | 1.07653  | 3.46653  |
| C  | 0.36451  | 0.17823  | 3.24248  |
| C  | 1.71799  | 0.79091  | 3.09479  |
| Cl | 3.38925  | 2.90526  | 3.47705  |
| H  | 2.22588  | 1.60556  | 5.08643  |
| Cl | 1.07896  | 4.21388  | 5.30507  |
| H  | 0.63979  | 3.43965  | 3.10804  |
| Cl | -0.30179 | 1.46034  | 6.11452  |
| H  | -1.37388 | 2.89415  | 4.57086  |
| Cl | -2.19364 | 0.13207  | 4.10625  |
| H  | -1.16359 | 1.54827  | 2.51267  |
| H  | 0.31250  | -0.81851 | 3.67455  |
| Cl | -0.06923 | -0.51391 | 1.08369  |
| Cl | 2.95930  | -0.46922 | 3.47875  |
| H  | 1.93167  | 1.10730  | 2.03620  |

gamma\_1\_ts

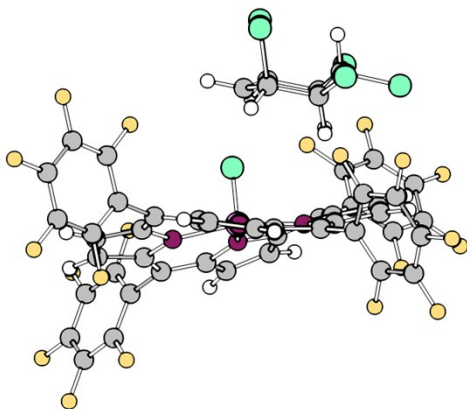

|   |          |          |          |
|---|----------|----------|----------|
| N | 0.81559  | -1.72980 | -0.90888 |
| C | 2.17652  | -1.92753 | -1.26039 |
| C | 2.48787  | -3.31398 | -1.41223 |
| C | 1.32886  | -4.01862 | -1.10677 |
| C | 0.30738  | -3.04869 | -0.81831 |
| C | 2.82075  | 2.59773  | -0.31548 |
| C | 3.60292  | 1.53395  | -0.71841 |
| C | 2.70497  | 0.43610  | -0.99431 |
| N | 1.35391  | 0.80779  | -0.76462 |
| C | 1.44100  | 2.18907  | -0.41359 |
| C | -1.98197 | 3.69985  | -0.87743 |
| C | -0.96957 | 2.71117  | -0.59799 |
| N | -1.47772 | 1.39580  | -0.80437 |
| C | -2.82416 | 1.61906  | -1.21104 |
| C | -3.11685 | 3.03393  | -1.29099 |
| C | -4.25659 | -1.86730 | -1.10909 |
| C | -3.36826 | -0.75265 | -1.17231 |
| N | -2.03526 | -1.12305 | -0.86545 |
| C | -2.12175 | -2.52580 | -0.67489 |
| C | -3.48471 | -2.97463 | -0.77031 |
| C | -3.74344 | 0.59348  | -1.42027 |
| C | 0.35428  | 3.07641  | -0.25189 |
| C | 3.10616  | -0.86218 | -1.31452 |
| C | -1.02819 | -3.40061 | -0.53154 |
| C | 0.58882  | 4.44603  | 0.17834  |
| C | 4.51208  | -1.14008 | -1.62959 |
| C | -1.30633 | -4.80426 | -0.16918 |
| C | -5.11198 | 0.87945  | -1.85662 |
| C | 1.31405  | 5.39578  | -0.60301 |
| C | 1.50507  | 6.70615  | -0.21184 |
| C | 0.96113  | 7.17741  | 1.01113  |
| C | 0.22113  | 6.26871  | 1.80830  |
| C | 0.04923  | 4.96098  | 1.39889  |
| C | -6.04737 | 1.52668  | -1.01909 |
| C | -7.36107 | 1.80082  | -1.43628 |
| C | -7.78197 | 1.41997  | -2.71899 |
| C | -6.88028 | 0.76662  | -3.57245 |
| C | -5.56900 | 0.50560  | -3.14049 |
| C | -1.62159 | -5.78118 | -1.13557 |
| C | -1.88728 | -7.11579 | -0.78572 |
| C | -1.84195 | -7.50772 | 0.55999  |
| C | -1.53035 | -6.55910 | 1.54400  |
| C | -1.26722 | -5.22880 | 1.17376  |
| C | 5.36422  | -1.78602 | -0.70755 |
| C | 6.70815  | -2.06707 | -1.00620 |
| C | 7.24064  | -1.69351 | -2.24923 |
| C | 6.42156  | -1.04120 | -3.18216 |
| C | 5.07804  | -0.77176 | -2.86812 |
| H | 3.43777  | -3.71198 | -1.69631 |
| H | 1.19841  | -5.07872 | -1.09982 |
| H | 3.14460  | 3.56812  | 0.01677  |

|    |          |          |          |
|----|----------|----------|----------|
| H  | 4.66807  | 1.49246  | -0.79968 |
| H  | -1.82488 | 4.75967  | -0.78180 |
| H  | -4.04718 | 3.45277  | -1.60770 |
| H  | -5.30990 | -1.83546 | -1.28363 |
| Fe | -0.34017 | -0.15984 | -0.58869 |
| H  | -3.82057 | -3.97787 | -0.62564 |
| F  | 1.78667  | 5.01376  | -1.79397 |
| F  | 2.18317  | 7.55682  | -0.99025 |
| F  | 1.14234  | 8.43848  | 1.39871  |
| F  | -0.29746 | 6.69470  | 2.96443  |
| F  | -0.63317 | 4.12558  | 2.19074  |
| F  | -5.69294 | 1.87528  | 0.21134  |
| F  | -8.21199 | 2.41244  | -0.61749 |
| F  | -9.02361 | 1.67260  | -3.12094 |
| F  | -7.27186 | 0.40110  | -4.78991 |
| F  | -4.74020 | -0.10465 | -3.97748 |
| F  | -1.67063 | -5.44133 | -2.41713 |
| F  | -2.18164 | -8.01089 | -1.72465 |
| F  | -2.09278 | -8.76829 | 0.89912  |
| F  | -1.48614 | -6.92276 | 2.82216  |
| F  | -0.97564 | -4.35221 | 2.12661  |
| F  | 4.89389  | -2.13318 | 0.48368  |
| F  | 7.48084  | -2.68229 | -0.11583 |
| F  | 8.51078  | -1.95622 | -2.54054 |
| F  | 6.91995  | -0.68511 | -4.36275 |
| F  | 4.32679  | -0.16162 | -3.77494 |
| Cl | -0.32633 | -0.23221 | 1.09000  |
| C  | 2.79375  | 1.23140  | 3.58580  |
| C  | 1.46179  | 1.93913  | 3.31128  |
| C  | 0.27440  | 1.06190  | 3.72591  |
| C  | 0.39699  | -0.36379 | 3.34812  |
| C  | 1.71051  | -1.01710 | 3.14982  |
| C  | 2.84225  | -0.05856 | 2.76011  |
| Cl | 4.13665  | 2.29162  | 3.06897  |
| H  | 2.92934  | 1.02551  | 4.67810  |
| Cl | 1.39222  | 3.47058  | 4.21189  |
| H  | 1.37761  | 2.21441  | 2.21794  |
| Cl | 0.13451  | 1.10918  | 5.54900  |
| H  | -0.68329 | 1.51710  | 3.36264  |
| H  | -0.42683 | -1.01385 | 3.63397  |
| Cl | 2.15625  | -1.81278 | 4.73313  |
| H  | 1.65575  | -1.86742 | 2.42122  |
| Cl | 4.41166  | -0.87519 | 3.01446  |
| H  | 2.79079  | 0.17749  | 1.65899  |

gamma\_2\_ts

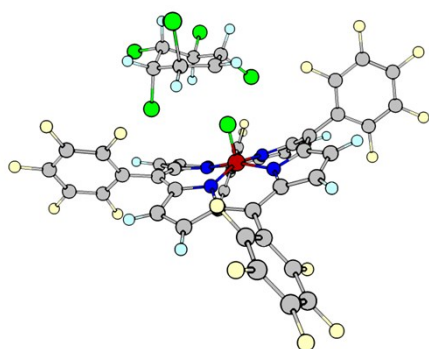

|   |          |          |          |
|---|----------|----------|----------|
| N | 0.90495  | -1.68679 | -1.09318 |
| C | 2.19310  | -1.89838 | -1.62697 |
| C | 2.44309  | -3.26492 | -1.85407 |
| C | 1.31067  | -3.96194 | -1.39427 |
| C | 0.38111  | -2.99244 | -0.94395 |
| C | 2.93213  | 2.55536  | -0.46567 |
| C | 3.67861  | 1.54237  | -1.02356 |
| C | 2.76091  | 0.45216  | -1.31810 |
| N | 1.44034  | 0.79488  | -0.93523 |
| C | 1.54218  | 2.15384  | -0.50972 |
| C | -1.84811 | 3.71652  | -0.95939 |
| C | -0.86647 | 2.70006  | -0.64252 |
| N | -1.40885 | 1.40182  | -0.85025 |
| C | -2.73944 | 1.64860  | -1.28589 |
| C | -2.98259 | 3.08196  | -1.40187 |
| C | -4.18609 | -1.80105 | -0.99601 |
| C | -3.30575 | -0.71439 | -1.17593 |
| N | -1.97530 | -1.06515 | -0.89668 |
| C | -2.04328 | -2.45222 | -0.60166 |
| C | -3.39630 | -2.89745 | -0.61272 |
| C | -3.67126 | 0.64640  | -1.49405 |
| C | 0.46283  | 3.03747  | -0.28460 |
| C | 3.12937  | -0.81072 | -1.76088 |
| C | -0.92372 | -3.30199 | -0.45559 |
| C | 0.70039  | 4.37760  | 0.22527  |
| C | 4.46850  | -1.06153 | -2.27481 |
| C | -1.15447 | -4.66016 | 0.06928  |
| C | -5.01328 | 0.90596  | -1.98456 |
| C | 1.48232  | 5.36058  | -0.45759 |
| C | 1.73157  | 6.61752  | 0.05932  |
| C | 1.18283  | 7.00393  | 1.30761  |
| C | 0.35108  | 6.07749  | 1.98760  |
| C | 0.11888  | 4.82667  | 1.45142  |
| C | -5.94337 | 1.70646  | -1.27716 |
| C | -7.23925 | 1.95803  | -1.75659 |
| C | -7.66205 | 1.39123  | -2.96833 |
| C | -6.77484 | 0.57443  | -3.68788 |
| C | -5.47945 | 0.34288  | -3.20043 |
| C | -1.48235 | -5.74473 | -0.77107 |

|    |          |          |          |
|----|----------|----------|----------|
| C  | -1.69634 | -7.03910 | -0.26807 |
| C  | -1.59106 | -7.28044 | 1.10920  |
| C  | -1.27524 | -6.22135 | 1.97097  |
| C  | -1.06357 | -4.93354 | 1.44834  |
| C  | 5.38501  | -1.92332 | -1.62499 |
| C  | 6.66605  | -2.18182 | -2.13989 |
| C  | 7.08449  | -1.56154 | -3.32722 |
| C  | 6.21029  | -0.68341 | -3.98642 |
| C  | 4.92919  | -0.44366 | -3.46319 |
| H  | 3.31987  | -3.69156 | -2.28601 |
| H  | 1.17476  | -5.01955 | -1.39548 |
| H  | 3.27876  | 3.49192  | -0.06697 |
| H  | 4.73304  | 1.51238  | -1.19679 |
| H  | -1.66007 | 4.77219  | -0.86957 |
| H  | -3.88619 | 3.51983  | -1.76775 |
| H  | -5.24503 | -1.78546 | -1.12268 |
| Fe | -0.24350 | -0.15007 | -0.66314 |
| H  | -3.73569 | -3.88470 | -0.39491 |
| F  | 1.94677  | 5.07213  | -1.67731 |
| F  | 2.47019  | 7.49827  | -0.62406 |
| F  | 1.43389  | 8.20501  | 1.82415  |
| F  | -0.19753 | 6.43067  | 3.15485  |
| F  | -0.67798 | 3.98633  | 2.12211  |
| F  | -5.60577 | 2.21773  | -0.09868 |
| F  | -8.07655 | 2.72095  | -1.05903 |
| F  | -8.88838 | 1.62108  | -3.42788 |
| F  | -7.16761 | 0.03167  | -4.83726 |
| F  | -4.66558 | -0.41695 | -3.92205 |
| F  | -1.60125 | -5.54911 | -2.07790 |
| F  | -2.00114 | -8.03853 | -1.09173 |
| F  | -1.79212 | -8.50245 | 1.59295  |
| F  | -1.17887 | -6.44004 | 3.27945  |
| F  | -0.77432 | -3.95123 | 2.29238  |
| F  | 5.04978  | -2.49005 | -0.47258 |
| F  | 7.49340  | -3.00401 | -1.50022 |
| F  | 8.29609  | -1.80028 | -3.81974 |
| F  | 6.59914  | -0.08875 | -5.11086 |
| F  | 4.12559  | 0.37957  | -4.12423 |
| Cl | -0.17889 | -0.25314 | 0.97320  |
| C  | 2.24813  | 0.95405  | 4.57239  |
| C  | 1.13301  | 1.77393  | 3.91994  |
| C  | -0.14399 | 0.93534  | 3.79914  |
| C  | 0.02793  | -0.46847 | 3.39460  |
| C  | 1.30265  | -1.19656 | 3.62819  |
| C  | 2.54958  | -0.30809 | 3.75968  |
| Cl | 3.72575  | 1.95604  | 4.67581  |
| H  | 1.96551  | 0.69518  | 5.62599  |
| H  | 0.94131  | 2.71003  | 4.50997  |
| Cl | 1.60879  | 2.29655  | 2.29112  |
| Cl | -0.84514 | 0.86886  | 5.51446  |
| H  | -0.92466 | 1.46927  | 3.19953  |

|    |          |          |         |
|----|----------|----------|---------|
| H  | -0.86782 | -1.08466 | 3.34770 |
| H  | 1.18455  | -1.84032 | 4.54424 |
| Cl | 1.56542  | -2.34276 | 2.26704 |
| Cl | 3.81325  | -1.23312 | 4.65605 |
| H  | 2.98843  | -0.05230 | 2.75780 |

gamma\_3\_ts

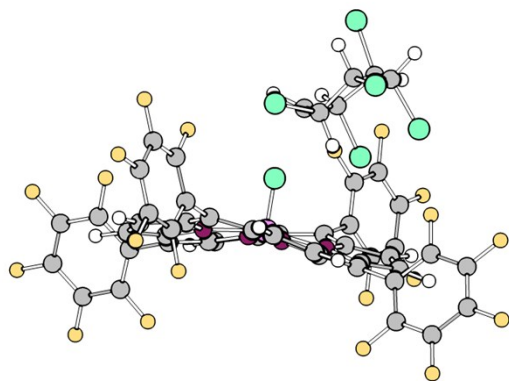

|   |          |          |          |
|---|----------|----------|----------|
| N | 0.89338  | -1.97113 | -1.08019 |
| C | 2.30671  | -2.01613 | -1.02799 |
| C | 2.79499  | -3.32496 | -1.36144 |
| C | 1.68683  | -4.10875 | -1.66965 |
| C | 0.53826  | -3.28471 | -1.47941 |
| C | 3.00630  | 2.67458  | -1.15821 |
| C | 3.73424  | 1.51192  | -0.93696 |
| C | 2.79045  | 0.42661  | -0.86360 |
| N | 1.46077  | 0.90802  | -0.96196 |
| C | 1.62782  | 2.29855  | -1.16995 |
| C | -1.93548 | 3.59063  | -0.93551 |
| C | -0.76819 | 2.74085  | -1.04564 |
| N | -1.09670 | 1.38251  | -0.80098 |
| C | -2.49384 | 1.42053  | -0.52332 |
| C | -2.98618 | 2.77709  | -0.56802 |
| C | -3.91447 | -2.07530 | -0.72527 |
| C | -2.94709 | -1.01205 | -0.57895 |
| N | -1.63675 | -1.47626 | -0.88848 |
| C | -1.84566 | -2.82294 | -1.28471 |
| C | -3.24502 | -3.18616 | -1.19150 |
| C | -3.33348 | 0.31134  | -0.27810 |
| C | 0.53445  | 3.19694  | -1.24491 |
| C | 3.16990  | -0.92589 | -0.77368 |
| C | -0.81261 | -3.70022 | -1.61258 |
| C | 0.80033  | 4.62537  | -1.43983 |
| C | 4.58313  | -1.24536 | -0.49867 |
| C | -1.11292 | -5.06072 | -2.06056 |
| C | -4.68780 | 0.53210  | 0.23229  |
| C | 1.21988  | 5.14259  | -2.68399 |
| C | 1.48086  | 6.51056  | -2.87374 |
| C | 1.32440  | 7.40729  | -1.80695 |
| C | 0.91248  | 6.92422  | -0.55575 |



|    |          |          |          |
|----|----------|----------|----------|
| C  | 0.66132  | 5.55282  | -0.38240 |
| C  | -5.02975 | 0.23390  | 1.58198  |
| C  | -6.29063 | 0.43622  | 2.10336  |
| C  | -7.32808 | 0.95734  | 1.28261  |
| C  | -7.02627 | 1.24693  | -0.07378 |
| C  | -5.75579 | 1.03481  | -0.56912 |
| C  | -1.71794 | -5.31069 | -3.31385 |
| C  | -2.00563 | -6.61177 | -3.75957 |
| C  | -1.68982 | -7.71533 | -2.95267 |
| C  | -1.09310 | -7.50221 | -1.70120 |
| C  | -0.81863 | -6.19384 | -1.26885 |
| C  | 4.98722  | -1.73148 | 0.76320  |
| C  | 6.32777  | -2.04163 | 1.05025  |
| C  | 7.31047  | -1.87532 | 0.06364  |
| C  | 6.93896  | -1.40677 | -1.20484 |
| C  | 5.59307  | -1.10502 | -1.47429 |
| H  | 3.82108  | -3.61922 | -1.38473 |
| H  | 1.68177  | -5.12812 | -1.98705 |
| H  | 3.38272  | 3.66624  | -1.28321 |
| H  | 4.79403  | 1.42486  | -0.83922 |
| H  | -1.94559 | 4.64578  | -1.10065 |
| H  | -4.00100 | 3.05700  | -0.35205 |
| H  | -4.96261 | -1.95999 | -0.51508 |
| Fe | -0.08907 | -0.30110 | -0.67510 |
| H  | -3.64607 | -4.14568 | -1.43488 |
| F  | 1.36922  | 4.32278  | -3.71646 |
| F  | 1.87238  | 6.96140  | -4.06254 |
| F  | 1.56676  | 8.70321  | -1.97915 |
| F  | 0.76955  | 7.76860  | 0.46173  |
| F  | 0.29847  | 5.12442  | 0.82047  |
| F  | -4.07271 | -0.25397 | 2.38102  |
| F  | -6.55433 | 0.15152  | 3.38416  |
| F  | -8.54850 | 1.16702  | 1.77337  |
| F  | -7.99604 | 1.71628  | -0.86769 |
| F  | -5.51606 | 1.28526  | -1.86069 |
| F  | -2.01597 | -4.29274 | -4.11029 |
| F  | -2.57040 | -6.80552 | -4.94805 |
| F  | -1.95385 | -8.94996 | -3.36922 |
| F  | -0.79683 | -8.54192 | -0.92601 |
| F  | -0.28052 | -6.03124 | -0.06611 |
| F  | 4.08190  | -1.90661 | 1.71675  |
| F  | 6.67112  | -2.49170 | 2.25376  |
| F  | 8.58154  | -2.16321 | 0.32653  |
| F  | 7.86334  | -1.25687 | -2.14985 |
| F  | 5.27435  | -0.69022 | -2.69396 |
| C  | 1.44551  | 2.05988  | 4.46152  |
| C  | 0.09990  | 2.74820  | 4.71172  |
| C  | -1.04398 | 1.73141  | 4.78027  |
| C  | -1.05674 | 0.70918  | 3.63179  |
| C  | 0.29576  | 0.20865  | 3.27726  |
| C  | 1.41075  | 1.19113  | 3.19198  |

|    |          |          |         |
|----|----------|----------|---------|
| Cl | 2.69668  | 3.33291  | 4.30222 |
| H  | 1.73208  | 1.44094  | 5.35062 |
| H  | 0.14717  | 3.35398  | 5.65170 |
| Cl | -0.24515 | 3.89275  | 3.38708 |
| Cl | -0.81617 | 0.81568  | 6.33067 |
| H  | -2.03563 | 2.24520  | 4.86578 |
| H  | -1.73891 | -0.14547 | 3.88811 |
| Cl | -1.82259 | 1.54019  | 2.24052 |
| H  | 0.52545  | -0.82078 | 3.52131 |
| Cl | 0.02492  | -0.35823 | 0.97023 |
| Cl | 2.98146  | 0.30471  | 3.11383 |
| H  | 1.35169  | 1.82926  | 2.26938 |

## Cl Transfer Mechanism

alphan\_b\_full\_ts

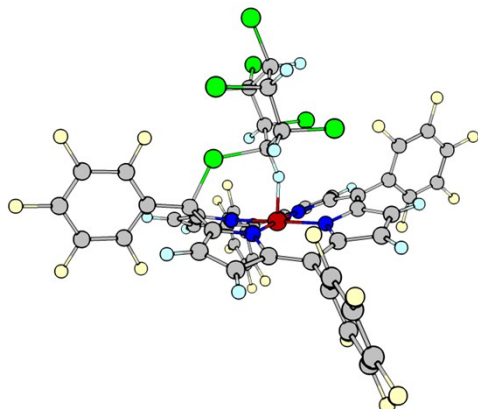

|   |          |          |          |
|---|----------|----------|----------|
| N | -1.53480 | -0.92636 | -0.99490 |
| C | -1.70244 | -2.21373 | -1.54073 |
| C | -3.09121 | -2.50508 | -1.71467 |
| C | -3.80609 | -1.42078 | -1.19175 |
| C | -2.84534 | -0.47970 | -0.74909 |
| C | 2.81062  | -3.21821 | -0.57537 |
| C | 1.73318  | -3.86658 | -1.10470 |
| C | 0.67735  | -2.86450 | -1.28035 |
| N | 1.12085  | -1.60108 | -0.88386 |
| C | 2.46348  | -1.79941 | -0.47278 |
| C | 3.94413  | 1.66395  | -0.44651 |
| C | 2.99784  | 0.57293  | -0.39903 |
| N | 1.71360  | 1.01339  | -0.78635 |
| C | 1.89918  | 2.38079  | -1.13061 |
| C | 3.28199  | 2.76617  | -0.94093 |
| C | -1.57979 | 3.94685  | -1.27409 |
| C | -0.50294 | 2.99782  | -1.27971 |
| N | -0.95816 | 1.73423  | -0.87505 |
| C | -2.30442 | 1.92441  | -0.57893 |
| C | -2.70422 | 3.27221  | -0.80663 |

|    |          |          |          |
|----|----------|----------|----------|
| C  | 0.87111  | 3.27062  | -1.49485 |
| C  | 3.34782  | -0.77687 | -0.15011 |
| C  | -0.62991 | -3.13009 | -1.72556 |
| C  | -3.08432 | 0.79769  | -0.04707 |
| H  | -3.49618 | -3.39124 | -2.15133 |
| H  | -4.86735 | -1.32073 | -1.13474 |
| H  | 3.77115  | -3.60428 | -0.28487 |
| H  | 1.62141  | -4.90153 | -1.33941 |
| H  | 4.97349  | 1.57689  | -0.14759 |
| H  | 3.67610  | 3.73916  | -1.13515 |
| H  | -1.50804 | 4.97044  | -1.56118 |
| Fe | 0.10348  | 0.06163  | -0.86564 |
| H  | -3.67680 | 3.67824  | -0.64355 |
| C  | -0.91517 | -4.44157 | -2.32694 |
| C  | -4.54899 | 1.07786  | 0.17199  |
| C  | 1.24416  | 4.59854  | -2.01362 |
| C  | 4.67366  | -1.10496 | 0.36838  |
| C  | 1.25438  | 5.74528  | -1.19321 |
| C  | 1.59190  | 7.01469  | -1.69320 |
| C  | 1.93680  | 7.16432  | -3.04409 |
| C  | 1.94230  | 6.04060  | -3.88255 |
| C  | 1.60043  | 4.77860  | -3.36578 |
| F  | 0.94575  | 5.63384  | 0.09213  |
| F  | 1.58835  | 8.07585  | -0.89104 |
| F  | 2.25623  | 8.36169  | -3.52546 |
| F  | 2.26905  | 6.17553  | -5.16485 |
| F  | 1.61206  | 3.73541  | -4.18410 |
| C  | 5.85535  | -1.04163 | -0.42787 |
| C  | 7.10317  | -1.37550 | 0.06322  |
| C  | 7.25431  | -1.79638 | 1.40791  |
| C  | 6.09382  | -1.86397 | 2.22992  |
| C  | 4.85881  | -1.52953 | 1.71505  |
| F  | 5.73822  | -0.67493 | -1.70776 |
| F  | 8.18235  | -1.31220 | -0.72444 |
| F  | 8.45174  | -2.11697 | 1.89282  |
| F  | 6.22431  | -2.24857 | 3.50396  |
| F  | 3.78633  | -1.57917 | 2.50920  |
| C  | -1.60936 | -5.45129 | -1.62763 |
| C  | -1.88808 | -6.70191 | -2.20530 |
| C  | -1.46442 | -6.97745 | -3.51355 |
| C  | -0.76356 | -5.99714 | -4.23128 |
| C  | -0.49587 | -4.75079 | -3.63862 |
| F  | -2.00693 | -5.23050 | -0.38100 |
| F  | -2.54839 | -7.62813 | -1.51587 |
| F  | -1.72448 | -8.15726 | -4.06785 |
| F  | -0.35877 | -6.25169 | -5.47223 |
| F  | 0.16306  | -3.84324 | -4.34553 |
| C  | -5.25124 | 0.93922  | 1.38115  |
| C  | -6.62214 | 1.25790  | 1.49445  |
| C  | -7.34307 | 1.70368  | 0.38440  |
| C  | -6.68428 | 1.81258  | -0.84890 |

|    |          |          |          |
|----|----------|----------|----------|
| C  | -5.32174 | 1.49300  | -0.94356 |
| F  | -4.68811 | 0.48321  | 2.49278  |
| F  | -7.23289 | 1.12597  | 2.66913  |
| F  | -8.63182 | 2.00881  | 0.49042  |
| F  | -7.35720 | 2.21151  | -1.92497 |
| F  | -4.76509 | 1.57026  | -2.14478 |
| C  | -0.18333 | -0.40438 | 4.80138  |
| C  | -0.29463 | 0.98171  | 4.16883  |
| C  | 0.29114  | 0.97217  | 2.74667  |
| C  | -0.28897 | -0.12357 | 1.90431  |
| C  | -0.50552 | -1.47161 | 2.52065  |
| C  | -0.95589 | -1.44802 | 3.99233  |
| H  | 0.89543  | -0.71386 | 4.89688  |
| Cl | -0.86212 | -0.36422 | 6.46540  |
| H  | -1.35700 | 1.33820  | 4.15194  |
| Cl | 0.61577  | 2.15945  | 5.16725  |
| H  | 0.14825  | 1.97471  | 2.26315  |
| Cl | 2.07110  | 0.73016  | 2.86630  |
| Cl | -2.18836 | 0.50178  | 1.63282  |
| H  | 0.12155  | -0.15059 | 0.82751  |
| H  | -1.21847 | -2.08055 | 1.90199  |
| Cl | 1.05002  | -2.39523 | 2.51754  |
| Cl | -2.71494 | -1.06538 | 4.04669  |
| H  | -0.85344 | -2.45845 | 4.46110  |

alphab\_c\_full\_ts

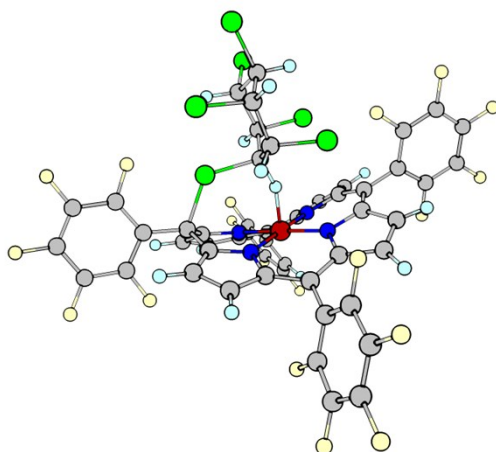

|   |          |          |          |
|---|----------|----------|----------|
| N | -1.47493 | -1.16510 | -0.80595 |
| C | -1.44967 | -2.47740 | -1.27950 |
| C | -2.73926 | -3.08797 | -1.13018 |
| C | -3.56709 | -2.14157 | -0.53055 |
| C | -2.78099 | -0.96721 | -0.35141 |
| C | 3.26183  | -2.54656 | -0.91346 |
| C | 2.27461  | -3.35666 | -1.44355 |
| C | 1.02999  | -2.62013 | -1.38737 |
| N | 1.25920  | -1.31805 | -0.90341 |
| C | 2.64322  | -1.27922 | -0.60608 |

|    |          |          |          |
|----|----------|----------|----------|
| C  | 3.55905  | 2.41597  | -0.59157 |
| C  | 2.81220  | 1.18020  | -0.47161 |
| N  | 1.47543  | 1.37680  | -0.83974 |
| C  | 1.40381  | 2.70592  | -1.26116 |
| C  | 2.69276  | 3.35430  | -1.11432 |
| C  | -2.32096 | 3.51380  | -1.39727 |
| C  | -1.07288 | 2.81844  | -1.35308 |
| N  | -1.24659 | 1.53467  | -0.78359 |
| C  | -2.59636 | 1.50198  | -0.40097 |
| C  | -3.26543 | 2.69390  | -0.77257 |
| C  | 0.20866  | 3.34478  | -1.66772 |
| C  | 3.35169  | -0.10653 | -0.26031 |
| C  | -0.24897 | -3.14195 | -1.68290 |
| C  | -3.15760 | 0.31265  | 0.24728  |
| H  | -2.99019 | -4.08355 | -1.41438 |
| H  | -4.58925 | -2.26237 | -0.25368 |
| H  | 4.29348  | -2.77748 | -0.76854 |
| H  | 2.39123  | -4.34566 | -1.83047 |
| H  | 4.58585  | 2.53940  | -0.32886 |
| H  | 2.89060  | 4.37581  | -1.35323 |
| H  | -2.48780 | 4.47632  | -1.82235 |
| Fe | 0.00012  | 0.10522  | -0.80768 |
| H  | -4.29599 | 2.91603  | -0.60892 |
| C  | -0.39337 | -4.43832 | -2.33205 |
| C  | -4.61992 | 0.44372  | 0.57648  |
| C  | 0.32239  | 4.62211  | -2.37982 |
| C  | 4.75864  | -0.23006 | 0.15675  |
| C  | -0.06719 | 5.86042  | -1.81780 |
| C  | 0.04327  | 7.06081  | -2.53580 |
| C  | 0.56562  | 7.05087  | -3.83743 |
| C  | 0.97516  | 5.82659  | -4.39038 |
| C  | 0.86384  | 4.63021  | -3.68257 |
| F  | -0.52269 | 5.91280  | -0.57049 |
| F  | -0.33521 | 8.21242  | -1.98645 |
| F  | 0.67435  | 8.18309  | -4.52925 |
| F  | 1.48044  | 5.81245  | -5.62379 |
| H  | 1.18568  | 3.67721  | -4.11921 |
| C  | -5.55008 | 0.34534  | -0.49293 |
| C  | -6.93710 | 0.42994  | -0.30440 |
| C  | -7.45691 | 0.63638  | 0.98197  |
| C  | -6.57004 | 0.76560  | 2.05204  |
| C  | -5.17623 | 0.67807  | 1.84307  |
| F  | -5.11722 | 0.18146  | -1.73514 |
| F  | -7.76533 | 0.32110  | -1.34044 |
| F  | -8.76986 | 0.71467  | 1.17525  |
| F  | -7.04045 | 0.97685  | 3.27924  |
| F  | -4.43208 | 0.84626  | 2.92805  |
| C  | 0.03943  | -5.65218 | -1.74266 |
| C  | -0.09438 | -6.89313 | -2.38652 |
| C  | -0.70126 | -6.96838 | -3.64939 |
| C  | -1.17422 | -5.79029 | -4.25127 |

|    |          |          |          |
|----|----------|----------|----------|
| C  | -1.02253 | -4.55697 | -3.59988 |
| F  | 0.55132  | -5.64359 | -0.51695 |
| F  | 0.33672  | -8.00573 | -1.79652 |
| F  | -0.83217 | -8.13966 | -4.26581 |
| F  | -1.75583 | -5.85351 | -5.44668 |
| F  | -1.46678 | -3.46782 | -4.21227 |
| C  | 5.81814  | -0.05652 | -0.75907 |
| C  | 7.16498  | -0.16531 | -0.37443 |
| C  | 7.48845  | -0.46065 | 0.95714  |
| C  | 6.45859  | -0.64437 | 1.88970  |
| C  | 5.11567  | -0.52882 | 1.48764  |
| F  | 5.54799  | 0.20961  | -2.03091 |
| F  | 8.13629  | 0.00656  | -1.26796 |
| F  | 8.76053  | -0.56684 | 1.33055  |
| F  | 6.75906  | -0.92628 | 3.15477  |
| F  | 4.17144  | -0.70498 | 2.39984  |
| C  | -0.02184 | 0.94559  | 4.24792  |
| C  | 0.45399  | -0.40995 | 4.76536  |
| C  | -0.20206 | -1.55676 | 3.99443  |
| C  | 0.02639  | -1.42402 | 2.47656  |
| C  | -0.08993 | -0.03596 | 1.92708  |
| C  | 0.36788  | 1.11898  | 2.76965  |
| H  | -1.12844 | 1.06927  | 4.37820  |
| Cl | 0.74612  | 2.24683  | 5.21747  |
| H  | 1.57324  | -0.49380 | 4.69978  |
| Cl | 0.02707  | -0.57663 | 6.50591  |
| H  | 0.16692  | -2.54232 | 4.37348  |
| Cl | -1.97075 | -1.55209 | 4.31214  |
| Cl | 1.70879  | -2.07095 | 2.21931  |
| H  | -0.64328 | -2.12918 | 1.91017  |
| H  | 0.21188  | 0.05460  | 0.79777  |
| Cl | -2.04547 | 0.24553  | 1.89765  |
| Cl | 2.16937  | 1.28156  | 2.69843  |
| H  | -0.02463 | 2.09140  | 2.37111  |

deltaa\_a\_full\_ts

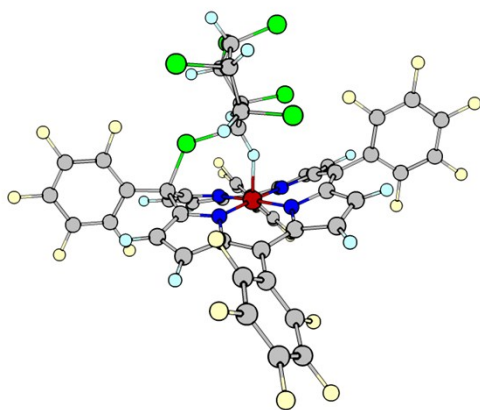

|    |          |          |          |
|----|----------|----------|----------|
| N  | -1.75811 | 0.88638  | -0.81324 |
| C  | -3.03280 | 0.51335  | -1.28673 |
| C  | -3.87965 | 1.64134  | -1.39939 |
| C  | -3.15423 | 2.74369  | -0.91408 |
| C  | -1.87381 | 2.26755  | -0.56854 |
| C  | -1.59822 | -3.90016 | -0.69060 |
| C  | -2.74361 | -3.29695 | -1.14785 |
| C  | -2.45607 | -1.87261 | -1.25626 |
| N  | -1.13747 | -1.60732 | -0.88336 |
| C  | -0.59393 | -2.84957 | -0.55656 |
| C  | 3.20051  | -2.54200 | -0.59411 |
| C  | 1.80757  | -2.15852 | -0.53446 |
| N  | 1.65055  | -0.80074 | -0.90815 |
| C  | 2.95893  | -0.38623 | -1.27126 |
| C  | 3.89978  | -1.45601 | -1.07884 |
| C  | 2.56715  | 3.39676  | -1.47500 |
| C  | 2.38479  | 1.96855  | -1.36200 |
| N  | 1.09106  | 1.69019  | -0.86006 |
| C  | 0.54306  | 2.91301  | -0.58532 |
| C  | 1.44005  | 3.98963  | -0.95184 |
| C  | 3.31744  | 0.94347  | -1.62021 |
| C  | 0.76456  | -3.07914 | -0.27201 |
| C  | -3.38537 | -0.85794 | -1.54617 |
| C  | -0.77704 | 3.04795  | 0.04231  |
| H  | -4.87444 | 1.65798  | -1.78489 |
| H  | -3.52077 | 3.74146  | -0.82343 |
| H  | -1.43038 | -4.93231 | -0.47609 |
| H  | -3.68804 | -3.74452 | -1.37068 |
| H  | 3.58736  | -3.49683 | -0.31502 |
| H  | 4.95409  | -1.37603 | -1.26617 |
| H  | 3.43092  | 3.87079  | -1.89635 |
| Fe | -0.02592 | 0.04732  | -0.83515 |
| H  | 1.24692  | 5.03125  | -0.83485 |
| C  | -4.70371 | -1.19936 | -2.03928 |
| C  | -1.15702 | 4.48421  | 0.31448  |
| C  | 4.63069  | 1.21626  | -2.14016 |
| C  | 1.14263  | -4.43407 | 0.18267  |
| C  | -4.88081 | -1.93700 | -3.24185 |
| C  | -6.14785 | -2.27574 | -3.73952 |
| C  | -7.30588 | -1.88495 | -3.04615 |
| C  | -7.17230 | -1.16747 | -1.84610 |
| C  | -5.89744 | -0.84749 | -1.35443 |
| F  | -3.81737 | -2.29961 | -3.94791 |
| F  | -6.26307 | -2.95790 | -4.87604 |
| F  | -8.51030 | -2.19447 | -3.51625 |
| F  | -8.26131 | -0.81118 | -1.16937 |
| F  | -5.82475 | -0.23766 | -0.17694 |
| C  | 1.12096  | -4.78903 | 1.54567  |
| C  | 1.47073  | -6.08041 | 1.98071  |
| C  | 1.85285  | -7.05457 | 1.04874  |
| C  | 1.88027  | -6.73017 | -0.31496 |

|    |          |          |          |
|----|----------|----------|----------|
| C  | 1.52748  | -5.43589 | -0.73223 |
| F  | 0.76104  | -3.89436 | 2.45331  |
| F  | 1.43981  | -6.38395 | 3.27547  |
| F  | 2.18413  | -8.27723 | 1.45297  |
| F  | 2.23776  | -7.65082 | -1.20656 |
| F  | 1.55543  | -5.16106 | -2.02979 |
| C  | 5.52450  | 2.17158  | -1.55722 |
| C  | 6.76890  | 2.46794  | -2.09082 |
| C  | 7.22340  | 1.80837  | -3.25726 |
| C  | 6.38689  | 0.82454  | -3.84230 |
| C  | 5.14980  | 0.53868  | -3.29133 |
| F  | 5.19005  | 2.73898  | -0.39726 |
| F  | 7.56584  | 3.36011  | -1.49661 |
| F  | 8.40840  | 2.09764  | -3.78702 |
| F  | 6.80705  | 0.18596  | -4.93764 |
| F  | 4.38542  | -0.36940 | -3.89683 |
| C  | -1.39873 | 5.32834  | -0.80364 |
| C  | -1.76201 | 6.67627  | -0.67590 |
| C  | -1.89675 | 7.24729  | 0.59854  |
| C  | -1.66079 | 6.44929  | 1.71863  |
| C  | -1.29578 | 5.09284  | 1.57037  |
| F  | -1.28312 | 4.85001  | -2.03523 |
| F  | -1.97947 | 7.41897  | -1.75799 |
| F  | -2.24162 | 8.52324  | 0.73405  |
| F  | -1.77918 | 6.96769  | 2.93858  |
| F  | -1.09308 | 4.44298  | 2.70926  |
| C  | -0.09370 | 0.13317  | 1.97374  |
| C  | -1.29377 | -0.38514 | 2.70994  |
| C  | -1.31126 | -0.22669 | 4.24069  |
| C  | 0.03867  | -0.05931 | 4.94993  |
| C  | 1.04177  | 0.73504  | 4.11676  |
| C  | 1.22564  | 0.22219  | 2.68537  |
| H  | -0.01215 | -0.26406 | 0.88850  |
| Cl | -0.52344 | 2.05493  | 1.69765  |
| H  | -2.23325 | 0.05480  | 2.26614  |
| Cl | -1.47641 | -2.16376 | 2.38553  |
| Cl | -2.27004 | 1.26522  | 4.64571  |
| H  | -1.88941 | -1.06431 | 4.71330  |
| H  | -0.09925 | 0.44842  | 5.94179  |
| Cl | 0.67496  | -1.68143 | 5.36117  |
| H  | 0.70303  | 1.80843  | 4.07766  |
| Cl | 2.61486  | 0.75071  | 4.97360  |
| H  | 1.93887  | 0.89164  | 2.12750  |
| Cl | 2.03444  | -1.38198 | 2.71076  |

deltaa\_b\_full\_ts



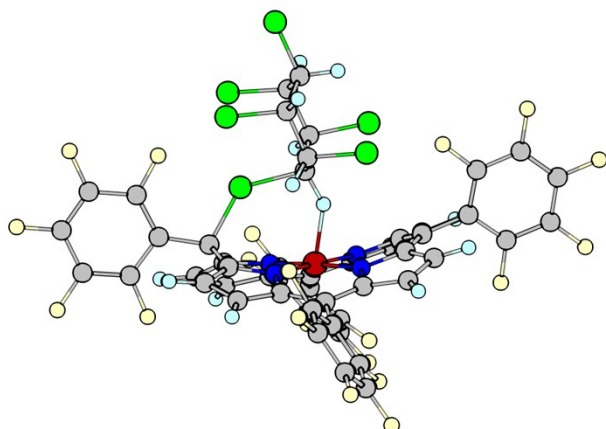

|    |          |          |          |
|----|----------|----------|----------|
| N  | -1.57420 | 0.87347  | -1.06825 |
| C  | -2.84663 | 0.55583  | -1.56033 |
| C  | -3.61144 | 1.75034  | -1.77868 |
| C  | -2.82620 | 2.81028  | -1.34387 |
| C  | -1.57805 | 2.24988  | -0.92180 |
| C  | -1.74149 | -3.83378 | -0.40748 |
| C  | -2.79338 | -3.19108 | -1.03469 |
| C  | -2.37728 | -1.83411 | -1.28127 |
| N  | -1.06003 | -1.62324 | -0.83467 |
| C  | -0.65850 | -2.88143 | -0.30858 |
| C  | 3.16038  | -2.99413 | 0.02362  |
| C  | 1.80386  | -2.48319 | -0.10664 |
| N  | 1.81343  | -1.19396 | -0.63453 |
| C  | 3.15690  | -0.92523 | -0.91501 |
| C  | 3.99473  | -2.03503 | -0.50000 |
| C  | 2.99159  | 2.77601  | -1.78225 |
| C  | 2.70962  | 1.43285  | -1.41145 |
| N  | 1.37776  | 1.31404  | -0.96382 |
| C  | 0.89169  | 2.63326  | -0.95959 |
| C  | 1.85968  | 3.53701  | -1.46096 |
| C  | 3.61428  | 0.31866  | -1.41101 |
| C  | 0.63313  | -3.23617 | 0.13599  |
| C  | -3.23575 | -0.80170 | -1.74619 |
| C  | -0.42054 | 2.95280  | -0.35893 |
| H  | -4.58874 | 1.80130  | -2.20108 |
| H  | -3.09435 | 3.84168  | -1.32426 |
| H  | -1.70609 | -4.84386 | -0.06392 |
| H  | -3.75295 | -3.59449 | -1.28041 |
| H  | 3.42217  | -3.93762 | 0.44606  |
| H  | 5.06056  | -2.05654 | -0.58000 |
| H  | 3.89300  | 3.13413  | -2.22979 |
| Fe | 0.13097  | -0.14046 | -0.83626 |
| H  | 1.76009  | 4.59279  | -1.57137 |
| C  | -4.50993 | -1.14491 | -2.33530 |
| C  | -0.65950 | 4.43526  | -0.17499 |
| C  | 4.97652  | 0.46418  | -1.84441 |
| C  | 0.79177  | -4.56871 | 0.75442  |
| C  | -0.78000 | 5.12097  | 1.04607  |

|    |          |          |          |
|----|----------|----------|----------|
| C  | -1.00245 | 6.51500  | 1.10556  |
| C  | -1.12132 | 7.27024  | -0.06205 |
| C  | -1.02052 | 6.61729  | -1.29872 |
| C  | -0.79955 | 5.23320  | -1.34153 |
| F  | -0.70243 | 4.52767  | 2.23147  |
| F  | -1.10152 | 7.11324  | 2.29044  |
| F  | -1.32888 | 8.58193  | -0.00523 |
| F  | -1.13781 | 7.31489  | -2.42601 |
| F  | -0.72829 | 4.67534  | -2.54336 |
| C  | -4.60241 | -2.00651 | -3.46574 |
| C  | -5.82471 | -2.33761 | -4.06599 |
| C  | -7.02704 | -1.81748 | -3.55537 |
| C  | -6.98108 | -0.98033 | -2.42777 |
| C  | -5.75139 | -0.66889 | -1.82964 |
| F  | -3.49281 | -2.49510 | -4.00611 |
| F  | -5.85678 | -3.13512 | -5.13120 |
| F  | -8.18956 | -2.11874 | -4.12619 |
| F  | -8.11513 | -0.50464 | -1.91816 |
| F  | -5.77516 | 0.04745  | -0.71156 |
| C  | 5.85471  | 1.47097  | -1.34325 |
| C  | 7.17248  | 1.62123  | -1.79074 |
| C  | 7.69936  | 0.74191  | -2.75386 |
| C  | 6.87919  | -0.28874 | -3.25090 |
| C  | 5.55985  | -0.41838 | -2.80524 |
| F  | 5.44936  | 2.26182  | -0.35486 |
| F  | 7.94714  | 2.58103  | -1.28824 |
| F  | 8.95079  | 0.87756  | -3.18229 |
| F  | 7.36695  | -1.12763 | -4.16302 |
| F  | 4.81629  | -1.37628 | -3.34634 |
| C  | 0.46732  | -4.80362 | 2.10605  |
| C  | 0.62650  | -6.06843 | 2.70059  |
| C  | 1.11590  | -7.14221 | 1.94454  |
| C  | 1.43763  | -6.94204 | 0.59468  |
| C  | 1.27087  | -5.67233 | 0.01638  |
| F  | -0.00281 | -3.81530 | 2.85223  |
| F  | 0.31511  | -6.25242 | 3.98103  |
| F  | 1.27086  | -8.34030 | 2.50054  |
| F  | 1.89508  | -7.95805 | -0.13280 |
| F  | 1.56671  | -5.52349 | -1.26831 |
| C  | -1.57894 | 0.02407  | 2.40484  |
| C  | -0.17684 | 0.21802  | 1.92239  |
| C  | 0.95191  | 0.24349  | 2.90352  |
| C  | 0.61883  | 0.88199  | 4.26603  |
| C  | -0.74928 | 0.40867  | 4.75067  |
| C  | -1.89680 | 0.65582  | 3.77450  |
| H  | -2.31990 | 0.36248  | 1.62759  |
| Cl | -1.92410 | -1.75523 | 2.62788  |
| H  | 0.07135  | -0.33830 | 0.94025  |
| Cl | -0.20715 | 2.11205  | 1.35921  |
| Cl | 1.48180  | -1.45824 | 3.30847  |
| H  | 1.86594  | 0.71584  | 2.45342  |

|    |          |          |         |
|----|----------|----------|---------|
| H  | 1.39999  | 0.63022  | 5.02789 |
| Cl | 0.68621  | 2.66238  | 4.09246 |
| H  | -0.68751 | -0.70308 | 4.94406 |
| Cl | -1.12533 | 1.15694  | 6.34161 |
| H  | -2.84827 | 0.23849  | 4.19376 |
| Cl | -2.21198 | 2.40168  | 3.54726 |

deltaa\_c\_full\_ts

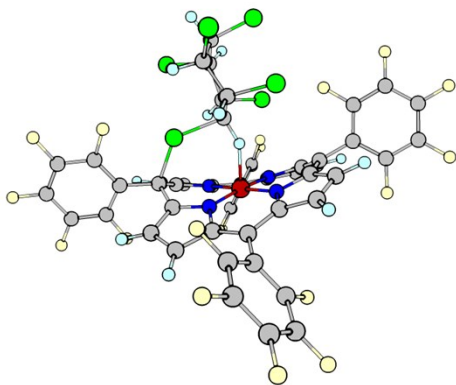

|   |          |          |          |
|---|----------|----------|----------|
| N | -1.58492 | 1.25180  | -0.81227 |
| C | -2.93195 | 1.21110  | -1.27552 |
| C | -3.44907 | 2.53558  | -1.44302 |
| C | -2.47229 | 3.40754  | -0.96434 |
| C | -1.35852 | 2.61396  | -0.56520 |
| C | -2.53715 | -3.37488 | -0.53876 |
| C | -3.57144 | -2.50052 | -0.84373 |
| C | -2.97184 | -1.22209 | -1.06511 |
| N | -1.58255 | -1.26914 | -0.87469 |
| C | -1.31646 | -2.61924 | -0.60637 |
| C | 2.34524  | -3.22173 | -1.39669 |
| C | 1.15763  | -2.50070 | -0.97544 |
| N | 1.34991  | -1.10136 | -1.10219 |
| C | 2.70097  | -0.98247 | -1.54512 |
| C | 3.27306  | -2.28555 | -1.78541 |
| C | 3.29867  | 2.71471  | -1.03551 |
| C | 2.71101  | 1.41742  | -1.26370 |
| N | 1.36063  | 1.41134  | -0.85301 |
| C | 1.13174  | 2.68322  | -0.39228 |
| C | 2.32032  | 3.50256  | -0.46846 |
| C | 3.38382  | 0.24410  | -1.67275 |
| C | -0.01321 | -3.16778 | -0.56160 |
| C | -3.62888 | -0.00792 | -1.41406 |
| C | -0.17064 | 3.09238  | 0.15044  |
| H | -4.40323 | 2.78859  | -1.84851 |
| H | -2.54492 | 4.47177  | -0.90541 |
| H | -2.61126 | -4.41204 | -0.30319 |
| H | -4.61456 | -2.71413 | -0.89688 |
| H | 2.43676  | -4.28568 | -1.41301 |

|    |          |          |          |
|----|----------|----------|----------|
| H  | 4.24857  | -2.45092 | -2.20355 |
| H  | 4.31727  | 2.96555  | -1.25751 |
| Fe | -0.10228 | 0.06057  | -0.87480 |
| H  | 2.40405  | 4.51289  | -0.13878 |
| C  | -5.00895 | -0.04787 | -1.87775 |
| C  | -0.24510 | 4.56511  | 0.48547  |
| C  | 4.74974  | 0.31654  | -2.13308 |
| C  | 0.11392  | -4.58951 | -0.17933 |
| C  | 5.82552  | -0.39652 | -1.51452 |
| C  | 7.13159  | -0.33470 | -1.96871 |
| C  | 7.46367  | 0.46441  | -3.09009 |
| C  | 6.43041  | 1.21012  | -3.71359 |
| C  | 5.13352  | 1.14061  | -3.23897 |
| F  | 5.57645  | -1.09133 | -0.40294 |
| F  | 8.10009  | -1.00998 | -1.34318 |
| F  | 8.71287  | 0.51941  | -3.54332 |
| F  | 6.72858  | 1.97198  | -4.77009 |
| F  | 4.18801  | 1.83089  | -3.87719 |
| C  | -0.49060 | 5.12543  | 1.74768  |
| C  | -0.52548 | 6.52134  | 1.96056  |
| C  | -0.32727 | 7.40628  | 0.89938  |
| C  | -0.10221 | 6.88280  | -0.38277 |
| C  | -0.06914 | 5.49421  | -0.57481 |
| F  | -0.71931 | 4.38880  | 2.82674  |
| F  | -0.75333 | 6.99386  | 3.18352  |
| F  | -0.35788 | 8.71972  | 1.09654  |
| F  | 0.07451  | 7.70788  | -1.41100 |
| F  | 0.12263  | 5.05908  | -1.81254 |
| C  | -0.17082 | -5.63239 | -1.08394 |
| C  | -0.06707 | -6.98481 | -0.71679 |
| C  | 0.33461  | -7.32599 | 0.58227  |
| C  | 0.63165  | -6.30999 | 1.50119  |
| C  | 0.52188  | -4.96114 | 1.11786  |
| F  | -0.54050 | -5.34206 | -2.32477 |
| F  | -0.34556 | -7.94383 | -1.59636 |
| F  | 0.43445  | -8.60334 | 0.93812  |
| F  | 1.01581  | -6.62922 | 2.73389  |
| F  | 0.81098  | -4.02437 | 2.00834  |
| C  | -5.37671 | -0.76744 | -3.04329 |
| C  | -6.70273 | -0.82135 | -3.50276 |
| C  | -7.71853 | -0.14981 | -2.80271 |
| C  | -7.39163 | 0.56334  | -1.63899 |
| C  | -6.06152 | 0.60124  | -1.18784 |
| F  | -4.44461 | -1.39538 | -3.74630 |
| F  | -7.00412 | -1.49951 | -4.60658 |
| F  | -8.97461 | -0.19128 | -3.23556 |
| F  | -8.34803 | 1.19187  | -0.96071 |
| F  | -5.80789 | 1.24363  | -0.05407 |
| C  | 1.76597  | 0.08802  | 3.97507  |
| C  | 1.54293  | -0.03284 | 2.45721  |
| C  | 0.13449  | 0.00120  | 1.95856  |

|    |          |          |         |
|----|----------|----------|---------|
| C  | -0.98866 | -0.39428 | 2.86619 |
| C  | -0.75472 | 0.12823  | 4.28634 |
| C  | 0.58885  | -0.26983 | 4.89247 |
| H  | 2.68044  | -0.48584 | 4.28193 |
| Cl | 2.16993  | 1.82035  | 4.35418 |
| H  | 2.16325  | 0.74034  | 1.91529 |
| Cl | 2.29809  | -1.60810 | 1.95506 |
| Cl | -0.23788 | 2.00007  | 1.76114 |
| H  | -0.00165 | -0.33327 | 0.86393 |
| H  | -1.97445 | -0.02090 | 2.47502 |
| Cl | -1.16349 | -2.18497 | 2.89378 |
| H  | -0.82072 | 1.25255  | 4.27690 |
| Cl | -2.06908 | -0.42571 | 5.37366 |
| H  | 0.70444  | 0.22812  | 5.89207 |
| Cl | 0.65214  | -2.02116 | 5.25471 |

deltaa\_d\_full\_ts

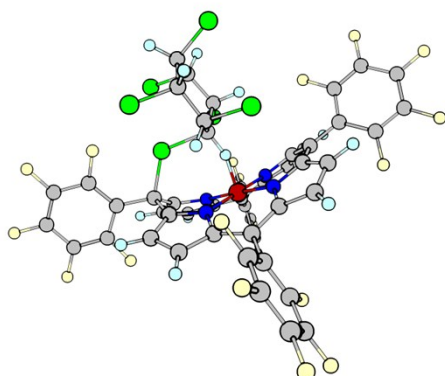

|   |          |          |          |
|---|----------|----------|----------|
| N | -1.35776 | -1.15375 | -0.79955 |
| C | -1.38173 | -2.42618 | -1.40579 |
| C | -2.72559 | -2.91828 | -1.46421 |
| C | -3.52811 | -1.96881 | -0.83233 |
| C | -2.67413 | -0.90153 | -0.43428 |
| C | 3.18161  | -2.76424 | -0.41636 |
| C | 2.23896  | -3.52088 | -1.07441 |
| C | 1.07602  | -2.67436 | -1.26039 |
| N | 1.31714  | -1.38625 | -0.74471 |
| C | 2.65160  | -1.42393 | -0.27269 |
| C | 3.70357  | 2.20759  | -0.26484 |
| C | 2.88033  | 1.00802  | -0.14815 |
| N | 1.56938  | 1.28852  | -0.60356 |
| C | 1.61219  | 2.61937  | -1.04739 |
| C | 2.94355  | 3.18037  | -0.85752 |
| C | -2.05245 | 3.59471  | -1.32088 |
| C | -0.83903 | 2.83019  | -1.26879 |
| N | -1.09451 | 1.54893  | -0.73169 |
| C | -2.45101 | 1.55773  | -0.41815 |
| C | -3.05118 | 2.80255  | -0.75701 |

|    |          |          |          |
|----|----------|----------|----------|
| C  | 0.47057  | 3.31220  | -1.49830 |
| C  | 3.39810  | -0.27658 | 0.08457  |
| C  | -0.18516 | -3.11840 | -1.71623 |
| C  | -3.05128 | 0.36857  | 0.22716  |
| H  | -3.03369 | -3.84088 | -1.89975 |
| H  | -4.58172 | -2.02367 | -0.67343 |
| H  | 2.30233  | -4.54233 | -1.37559 |
| H  | 4.73150  | 2.24967  | 0.04634  |
| H  | 3.22525  | 4.17427  | -1.12517 |
| H  | -2.14376 | 4.58737  | -1.69846 |
| Fe | 0.12303  | 0.06988  | -0.69463 |
| H  | -4.07022 | 3.07742  | -0.59723 |
| C  | -0.26585 | -4.40984 | -2.41317 |
| C  | -4.54227 | 0.45773  | 0.44993  |
| C  | 0.62831  | 4.64026  | -2.11359 |
| C  | 4.76346  | -0.40008 | 0.56992  |
| C  | -5.20640 | 0.27041  | 1.67412  |
| C  | -6.60641 | 0.40220  | 1.79960  |
| C  | -7.39539 | 0.69622  | 0.68572  |
| C  | -6.77270 | 0.83689  | -0.56261 |
| C  | -5.38030 | 0.70248  | -0.66905 |
| F  | -4.57269 | -0.06561 | 2.79010  |
| F  | -7.17917 | 0.23722  | 2.98966  |
| F  | -8.71278 | 0.82788  | 0.80240  |
| F  | -7.50810 | 1.08791  | -1.64291 |
| F  | -4.86004 | 0.78953  | -1.88582 |
| C  | 0.84830  | 5.79987  | -1.34225 |
| C  | 0.99400  | 7.06786  | -1.93100 |
| C  | 0.91661  | 7.20430  | -3.32430 |
| C  | 0.69311  | 6.06939  | -4.11659 |
| C  | 0.55154  | 4.80834  | -3.51140 |
| F  | 0.91218  | 5.70539  | -0.02084 |
| F  | 1.20105  | 8.14120  | -1.17291 |
| F  | 1.05212  | 8.40022  | -3.88914 |
| F  | 0.61714  | 6.19240  | -5.43895 |
| F  | 0.34343  | 3.75386  | -4.28739 |
| C  | 5.81363  | -0.99765 | -0.19396 |
| C  | 7.10340  | -1.14309 | 0.28179  |
| C  | 7.44768  | -0.67712 | 1.57556  |
| C  | 6.44364  | -0.03355 | 2.34505  |
| C  | 5.16322  | 0.10501  | 1.84518  |
| F  | 5.55718  | -1.36916 | -1.45104 |
| F  | 8.04935  | -1.70207 | -0.47986 |
| F  | 8.68042  | -0.83066 | 2.05216  |
| F  | 6.75602  | 0.43411  | 3.55772  |
| H  | 4.14478  | -3.07342 | -0.05542 |
| F  | 4.24888  | 0.71522  | 2.60272  |
| C  | 0.14376  | -4.53808 | -3.75784 |
| C  | 0.06213  | -5.76061 | -4.44710 |
| C  | -0.43469 | -6.89944 | -3.79647 |
| C  | -0.84089 | -6.80510 | -2.45756 |

|    |          |          |          |
|----|----------|----------|----------|
| C  | -0.74982 | -5.57559 | -1.78257 |
| F  | 0.61352  | -3.47934 | -4.40253 |
| F  | 0.45081  | -5.84365 | -5.71640 |
| F  | -0.51836 | -8.05845 | -4.44238 |
| F  | -1.30603 | -7.88262 | -1.83113 |
| F  | -1.11942 | -5.52803 | -0.50911 |
| C  | -0.38031 | -0.71864 | 4.89424  |
| C  | -0.76060 | -1.78817 | 3.86239  |
| C  | -0.27837 | -1.57593 | 2.41773  |
| C  | -0.20396 | -0.14947 | 1.97012  |
| C  | 0.48152  | 0.74548  | 2.96017  |
| C  | -0.09815 | 0.69776  | 4.37850  |
| H  | -1.15563 | -0.67995 | 5.70628  |
| Cl | 1.12163  | -1.27578 | 5.74430  |
| H  | -0.43725 | -2.80106 | 4.22369  |
| Cl | -2.56966 | -1.88505 | 3.83111  |
| Cl | 1.38899  | -2.29533 | 2.33684  |
| H  | -0.89896 | -2.19007 | 1.70864  |
| H  | 0.16451  | 0.01000  | 0.87652  |
| Cl | -2.11840 | 0.35269  | 1.87793  |
| H  | 1.57389  | 0.45599  | 3.01110  |
| Cl | 0.45524  | 2.45542  | 2.42594  |
| H  | 0.59465  | 1.24110  | 5.07414  |
| Cl | -1.63864 | 1.62504  | 4.46085  |

deltab\_a\_full\_ts

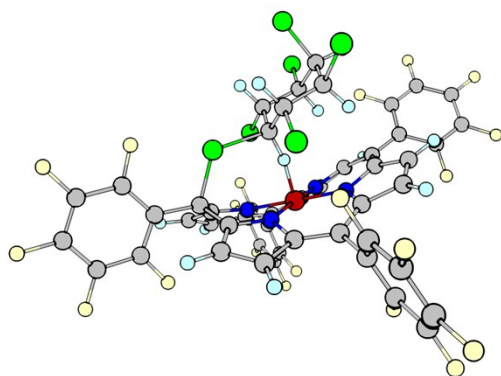

|   |          |          |          |
|---|----------|----------|----------|
| N | -1.50955 | -1.24806 | -0.60924 |
| C | -1.30515 | -2.48017 | -1.25864 |
| C | -2.54107 | -3.21159 | -1.32270 |
| C | -3.49368 | -2.47116 | -0.61521 |
| C | -2.84248 | -1.28964 | -0.18043 |
| C | 3.38170  | -2.18661 | -0.59974 |
| C | 2.45803  | -3.09789 | -1.05461 |
| C | 1.19614  | -2.38683 | -1.20344 |
| N | 1.33912  | -1.05476 | -0.84500 |
| C | 2.72325  | -0.90172 | -0.52172 |
| C | 3.00699  | 2.83565  | -0.72439 |
| C | 2.49722  | 1.51053  | -0.47619 |

|    |          |          |          |
|----|----------|----------|----------|
| N  | 1.08548  | 1.47552  | -0.69124 |
| C  | 0.75793  | 2.80259  | -1.07022 |
| C  | 1.95116  | 3.62435  | -1.12333 |
| C  | -2.99827 | 3.27254  | -0.54471 |
| C  | -1.71303 | 2.66530  | -0.77755 |
| N  | -1.71912 | 1.33567  | -0.34990 |
| C  | -2.99218 | 1.13271  | 0.16621  |
| C  | -3.79126 | 2.31116  | 0.07344  |
| C  | -0.54471 | 3.31339  | -1.24953 |
| C  | 3.30834  | 0.36048  | -0.32770 |
| C  | -0.02806 | -2.99927 | -1.58048 |
| C  | -3.35309 | -0.19957 | 0.68281  |
| H  | -2.68258 | -4.15358 | -1.80333 |
| H  | -4.50903 | -2.74195 | -0.42982 |
| H  | 4.40930  | -2.35682 | -0.34220 |
| H  | 2.59413  | -4.13890 | -1.24562 |
| H  | 4.04214  | 3.10809  | -0.63052 |
| H  | 1.96758  | 4.65539  | -1.39881 |
| H  | -3.26500 | 4.27481  | -0.79183 |
| Fe | -0.18028 | 0.12790  | -0.60964 |
| H  | -4.79623 | 2.41784  | 0.41324  |
| C  | 2.29283  | -0.48873 | 3.60854  |
| C  | 1.77868  | 0.82660  | 3.02026  |
| C  | 0.24406  | 0.83931  | 2.92297  |
| C  | -0.17606 | -0.31807 | 2.04973  |
| C  | 0.25704  | -1.64971 | 2.61668  |
| C  | 1.78518  | -1.68296 | 2.79681  |
| H  | 3.41024  | -0.49036 | 3.67517  |
| Cl | 1.68851  | -0.64795 | 5.30282  |
| Cl | 2.35922  | 2.16675  | 4.05015  |
| H  | 2.21689  | 0.99408  | 1.99409  |
| H  | -0.22904 | 0.80244  | 3.93445  |
| Cl | -0.24568 | 2.40510  | 2.20871  |
| Cl | -2.22441 | -0.36562 | 2.21627  |
| H  | -0.03920 | -0.15697 | 0.91873  |
| H  | -0.25489 | -1.86520 | 3.58868  |
| Cl | -0.18370 | -2.99492 | 1.51612  |
| Cl | 2.25250  | -3.17871 | 3.67801  |
| H  | 2.30654  | -1.72623 | 1.79701  |
| C  | 0.04206  | -4.33751 | -2.19213 |
| C  | -4.81289 | -0.33998 | 1.03218  |
| C  | -0.68885 | 4.65091  | -1.85289 |
| C  | 4.72372  | 0.50137  | -0.06284 |
| C  | 5.25250  | 1.23379  | 1.04865  |
| C  | 6.60665  | 1.31201  | 1.32721  |
| C  | 7.55320  | 0.68489  | 0.48142  |
| C  | 7.07560  | 0.00862  | -0.66990 |
| C  | 5.71870  | -0.06309 | -0.92485 |
| C  | -0.86991 | 5.81009  | -1.07069 |
| C  | -1.02536 | 7.08142  | -1.64957 |
| C  | -0.99573 | 7.22273  | -3.04416 |



|   |          |          |          |
|---|----------|----------|----------|
| C | -0.80898 | 6.08910  | -3.84752 |
| C | -0.65735 | 4.82474  | -3.25178 |
| C | -5.75714 | -0.23811 | -0.02322 |
| C | -7.14020 | -0.34777 | 0.18063  |
| C | -7.64135 | -0.56675 | 1.47228  |
| C | -6.74045 | -0.67173 | 2.53354  |
| C | -5.35086 | -0.55908 | 2.30944  |
| C | 0.29726  | -4.51481 | -3.56570 |
| C | 0.36030  | -5.79306 | -4.14922 |
| C | 0.16985  | -6.93344 | -3.35678 |
| C | -0.08017 | -6.78734 | -1.98405 |
| C | -0.13838 | -5.50339 | -1.41723 |
| F | 4.41275  | 1.84171  | 1.88953  |
| F | 7.03919  | 1.97947  | 2.40036  |
| F | 8.85441  | 0.74034  | 0.75047  |
| F | 7.95647  | -0.53206 | -1.51685 |
| F | 5.32834  | -0.61903 | -2.07354 |
| F | -0.88796 | 5.71257  | 0.25197  |
| F | -1.19797 | 8.15354  | -0.88098 |
| F | -1.14280 | 8.42174  | -3.59974 |
| F | -0.77873 | 6.21634  | -5.17139 |
| F | -0.48465 | 3.77188  | -4.03880 |
| F | -5.34343 | -0.03210 | -1.26594 |
| F | -7.98097 | -0.24497 | -0.84531 |
| F | -8.94948 | -0.67238 | 1.67984  |
| F | -7.19281 | -0.87969 | 3.76766  |
| F | -4.59496 | -0.67562 | 3.39282  |
| F | 0.47767  | -3.45446 | -4.34101 |
| F | 0.59737  | -5.92616 | -5.45139 |
| F | 0.22529  | -8.14499 | -3.90171 |
| F | -0.25819 | -7.86688 | -1.22747 |
| F | -0.36340 | -5.39054 | -0.11453 |

deltab\_d\_full\_ts

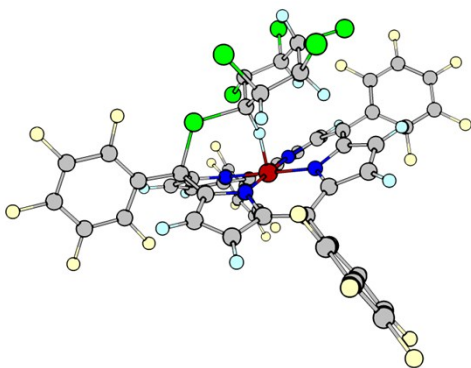

|   |         |          |         |
|---|---------|----------|---------|
| N | 1.41644 | -1.47281 | 0.52771 |
| C | 1.19726 | -2.72088 | 1.15649 |
| C | 2.40398 | -3.48734 | 1.15655 |

|    |          |          |          |
|----|----------|----------|----------|
| C  | 3.35077  | -2.75218 | 0.43734  |
| C  | 2.73083  | -1.53320 | 0.06181  |
| C  | -3.39554 | -2.01542 | 0.44960  |
| C  | -2.56488 | -3.02123 | 0.93569  |
| C  | -1.27184 | -2.43913 | 1.12460  |
| N  | -1.27983 | -1.08813 | 0.73843  |
| C  | -2.61727 | -0.81713 | 0.39089  |
| C  | -2.75567 | 2.97198  | 0.66631  |
| C  | -2.26653 | 1.63536  | 0.38957  |
| N  | -0.88685 | 1.56046  | 0.64142  |
| C  | -0.53075 | 2.84851  | 1.10703  |
| C  | -1.69169 | 3.71185  | 1.13935  |
| C  | 3.27146  | 2.99377  | 0.79423  |
| C  | 1.91752  | 2.52866  | 0.92710  |
| N  | 1.79975  | 1.22382  | 0.41881  |
| C  | 3.06278  | 0.91141  | -0.06610 |
| C  | 3.97738  | 1.98691  | 0.14375  |
| C  | 0.79104  | 3.27167  | 1.35443  |
| C  | -3.10238 | 0.51382  | 0.17278  |
| C  | -0.10200 | -3.14534 | 1.53097  |
| C  | 3.31527  | -0.39964 | -0.69284 |
| H  | 2.54339  | -4.43966 | 1.61416  |
| H  | 4.34910  | -3.05191 | 0.20958  |
| H  | -4.42075 | -2.11114 | 0.16904  |
| H  | -2.81881 | -4.04002 | 1.12104  |
| H  | -3.76870 | 3.29028  | 0.53805  |
| H  | -1.68632 | 4.73198  | 1.45353  |
| H  | 3.63965  | 3.93808  | 1.12248  |
| Fe | 0.26728  | 0.04915  | 0.57155  |
| H  | 5.00320  | 2.00535  | -0.14812 |
| C  | -0.28715 | -4.40697 | 2.24635  |
| C  | 4.77237  | -0.61711 | -1.03133 |
| C  | 1.00181  | 4.58826  | 1.97523  |
| C  | -4.52727 | 0.72792  | -0.04469 |
| C  | 5.70322  | -0.66268 | 0.04135  |
| C  | 7.07867  | -0.85403 | -0.15197 |
| C  | 7.58811  | -1.01207 | -1.44914 |
| C  | 6.70194  | -0.97533 | -2.52615 |
| C  | 5.31928  | -0.78182 | -2.31264 |
| F  | 5.28606  | -0.52279 | 1.29204  |
| F  | 7.90615  | -0.88701 | 0.88987  |
| F  | 8.89009  | -1.19350 | -1.64631 |
| F  | 7.16145  | -1.12379 | -3.76663 |
| F  | 4.58049  | -0.76835 | -3.41432 |
| C  | 1.42117  | 5.71166  | 1.23079  |
| C  | 1.63742  | 6.96462  | 1.83001  |
| C  | 1.42634  | 7.12789  | 3.20661  |
| C  | 0.99751  | 6.03340  | 3.97122  |
| C  | 0.78988  | 4.78630  | 3.35673  |
| F  | 1.60455  | 5.60121  | -0.07828 |
| F  | 2.03596  | 8.00076  | 1.09657  |

|    |          |          |          |
|----|----------|----------|----------|
| F  | 1.62822  | 8.31018  | 3.78089  |
| F  | 0.79232  | 6.18196  | 5.27729  |
| F  | 0.38829  | 3.77157  | 4.10956  |
| C  | -5.05164 | 1.43479  | -1.15906 |
| C  | -6.43101 | 1.60014  | -1.36988 |
| C  | -7.35606 | 1.07161  | -0.45637 |
| C  | -6.87764 | 0.40161  | 0.68120  |
| C  | -5.49687 | 0.25566  | 0.88349  |
| F  | -4.23944 | 1.97360  | -2.05985 |
| F  | -6.87015 | 2.25619  | -2.44076 |
| F  | -8.66271 | 1.21436  | -0.65693 |
| F  | -7.74142 | -0.07219 | 1.57616  |
| F  | -5.10336 | -0.30107 | 2.02233  |
| C  | 0.03693  | -5.66333 | 1.68311  |
| C  | -0.13032 | -6.86709 | 2.38900  |
| C  | -0.65431 | -6.85062 | 3.69022  |
| C  | -1.01125 | -5.62288 | 4.27029  |
| C  | -0.83113 | -4.42793 | 3.55436  |
| F  | 0.48189  | -5.73081 | 0.43445  |
| F  | 0.19473  | -8.02735 | 1.82438  |
| F  | -0.81522 | -7.98523 | 4.36478  |
| F  | -1.51315 | -5.59995 | 5.50225  |
| F  | -1.16934 | -3.28797 | 4.14016  |
| C  | -0.16936 | 0.89158  | -3.04373 |
| C  | -1.70370 | 0.86503  | -3.13386 |
| C  | -2.21915 | -0.48631 | -3.64467 |
| C  | -1.71397 | -1.63670 | -2.77001 |
| C  | -0.19876 | -1.56827 | -2.55042 |
| C  | 0.26532  | -0.21155 | -2.11059 |
| H  | 0.30487  | 0.80920  | -4.05155 |
| Cl | 0.31110  | 2.49795  | -2.40582 |
| H  | -2.13422 | 1.11391  | -2.12394 |
| Cl | -2.26457 | 2.13158  | -4.27852 |
| Cl | -4.01852 | -0.45088 | -3.56760 |
| H  | -1.94858 | -0.64648 | -4.71833 |
| H  | -2.24984 | -1.66082 | -1.77555 |
| Cl | -2.10370 | -3.19576 | -3.57903 |
| H  | 0.15490  | -2.38615 | -1.87310 |
| Cl | 0.57445  | -1.92843 | -4.18095 |
| H  | 0.08701  | 0.02258  | -0.97955 |
| Cl | 2.22652  | -0.34000 | -2.25524 |

gammaa\_b\_full\_ts

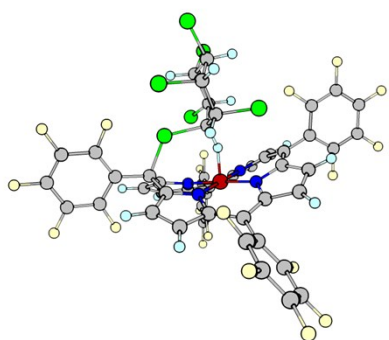

|    |          |          |          |
|----|----------|----------|----------|
| N  | -1.41843 | -1.20224 | -0.85180 |
| C  | -1.47576 | -2.47649 | -1.44423 |
| C  | -2.84514 | -2.88694 | -1.56564 |
| C  | -3.62156 | -1.91069 | -0.95886 |
| C  | -2.71829 | -0.88454 | -0.52448 |
| C  | 3.11206  | -2.79021 | -0.59662 |
| C  | 2.15130  | -3.53784 | -1.23067 |
| C  | 0.96590  | -2.70790 | -1.38485 |
| N  | 1.21734  | -1.41720 | -0.86165 |
| C  | 2.55585  | -1.46221 | -0.40718 |
| C  | 3.72003  | 2.15569  | -0.40666 |
| C  | 2.86468  | 0.98726  | -0.28885 |
| N  | 1.56944  | 1.28873  | -0.72335 |
| C  | 1.62422  | 2.62130  | -1.15299 |
| C  | 2.96294  | 3.15375  | -0.98071 |
| C  | -2.03422 | 3.61830  | -1.33641 |
| C  | -0.83465 | 2.84055  | -1.32454 |
| N  | -1.09116 | 1.55326  | -0.79913 |
| C  | -2.44811 | 1.57588  | -0.45600 |
| C  | -3.03499 | 2.82779  | -0.76390 |
| C  | 0.47705  | 3.32369  | -1.58015 |
| C  | 3.29800  | -0.32524 | -0.01931 |
| C  | -0.29396 | -3.20801 | -1.77929 |
| C  | -3.05535 | 0.37909  | 0.16130  |
| H  | -3.18507 | -3.77913 | -2.04848 |
| H  | -4.68044 | -1.90668 | -0.83862 |
| H  | 4.09317  | -3.08630 | -0.29886 |
| H  | 2.20714  | -4.56326 | -1.54390 |
| H  | 4.74715  | 2.19080  | -0.11565 |
| H  | 3.26848  | 4.14159  | -1.24545 |
| H  | -2.12552 | 4.61696  | -1.69656 |
| Fe | 0.06447  | 0.05489  | -0.78300 |
| H  | -4.04614 | 3.11749  | -0.58288 |
| C  | -0.36851 | -4.49298 | -2.41551 |
| C  | -4.53273 | 0.49559  | 0.44681  |
| C  | 0.61922  | 4.64974  | -2.19508 |
| C  | 4.66374  | -0.52358 | 0.49994  |
| C  | 4.92716  | -0.63778 | 1.87835  |
| C  | 6.22924  | -0.82343 | 2.37674  |
| C  | 7.31222  | -0.89913 | 1.49124  |

|    |          |          |          |
|----|----------|----------|----------|
| C  | 7.08254  | -0.78841 | 0.11236  |
| C  | 5.77491  | -0.60429 | -0.36634 |
| F  | 3.92837  | -0.56887 | 2.74805  |
| F  | 6.43821  | -0.92694 | 3.68634  |
| F  | 8.54664  | -1.07348 | 1.95337  |
| F  | 8.10582  | -0.85813 | -0.73500 |
| F  | 5.59070  | -0.50363 | -1.67609 |
| C  | 0.38122  | 4.84254  | -3.57388 |
| C  | 0.51318  | 6.10229  | -4.18323 |
| C  | 0.88873  | 7.21557  | -3.41691 |
| C  | 1.12284  | 7.05760  | -2.04344 |
| C  | 0.98191  | 5.79159  | -1.44911 |
| F  | 0.03080  | 3.81033  | -4.32791 |
| F  | 0.28722  | 6.24583  | -5.48621 |
| F  | 1.01932  | 8.40977  | -3.98678 |
| F  | 1.47099  | 8.11014  | -1.30785 |
| F  | 1.18254  | 5.68577  | -0.14172 |
| C  | -5.40650 | 0.77877  | -0.63593 |
| C  | -6.79054 | 0.94117  | -0.47445 |
| C  | -7.36910 | 0.79302  | 0.79429  |
| C  | -6.54551 | 0.46519  | 1.87298  |
| C  | -5.15442 | 0.30520  | 1.69238  |
| F  | -4.92947 | 0.87931  | -1.86901 |
| F  | -7.56015 | 1.22700  | -1.52157 |
| F  | -8.67782 | 0.95132  | 0.96295  |
| F  | -7.07573 | 0.29538  | 3.08186  |
| F  | -4.48858 | -0.05697 | 2.78229  |
| C  | 0.39272  | -4.80298 | -3.59070 |
| C  | 0.30296  | -6.01847 | -4.25291 |
| C  | -0.55181 | -7.03719 | -3.76963 |
| C  | -1.28612 | -6.79175 | -2.58761 |
| C  | -1.18210 | -5.56990 | -1.93603 |
| F  | 1.18219  | -3.86479 | -4.11056 |
| F  | 1.01098  | -6.23940 | -5.36299 |
| F  | -0.65380 | -8.20024 | -4.40688 |
| F  | -2.05393 | -7.76217 | -2.08637 |
| F  | -1.79246 | -5.44208 | -0.75777 |
| C  | -0.12180 | -1.52413 | 2.39889  |
| C  | -0.14405 | -0.11691 | 1.89817  |
| C  | 0.44665  | 0.91788  | 2.82206  |
| C  | -0.02149 | 0.74706  | 4.27859  |
| C  | 0.20851  | -0.68649 | 4.76016  |
| C  | -0.51102 | -1.70751 | 3.87685  |
| H  | -0.71801 | -2.20789 | 1.73827  |
| Cl | 1.60239  | -2.13801 | 2.33221  |
| H  | 0.21183  | 0.01050  | 0.79198  |
| Cl | -2.06186 | 0.28960  | 1.79710  |
| H  | 1.56652  | 0.90024  | 2.75297  |
| Cl | -0.05912 | 2.55404  | 2.28282  |
| Cl | 0.95601  | 1.83447  | 5.33338  |
| H  | -1.09235 | 1.05339  | 4.39921  |

|    |          |          |         |
|----|----------|----------|---------|
| H  | 1.30518  | -0.92233 | 4.80291 |
| Cl | -0.40953 | -0.85706 | 6.44022 |
| H  | -0.28449 | -2.74821 | 4.22136 |
| Cl | -2.28278 | -1.51214 | 4.05640 |

Minima

alphaa

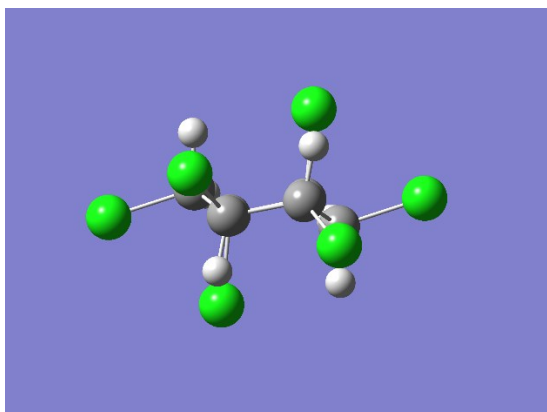

|    |          |          |          |
|----|----------|----------|----------|
| C  | -4.46162 | -0.46598 | -0.59969 |
| C  | -3.98217 | 0.87224  | -0.02920 |
| C  | -2.47613 | 1.06292  | -0.23504 |
| C  | -1.66196 | -0.10838 | 0.32987  |
| C  | -2.15183 | -1.46130 | -0.21485 |
| C  | -3.66360 | -1.63996 | -0.02365 |
| H  | -5.55750 | -0.61382 | -0.41312 |
| Cl | -4.23911 | -0.39943 | -2.37342 |
| H  | -4.54664 | 1.72867  | -0.48254 |
| Cl | -4.35514 | 0.86990  | 1.72036  |
| H  | -2.25567 | 1.20876  | -1.32786 |
| Cl | -1.99396 | 2.56668  | 0.59255  |
| Cl | 0.03864  | 0.10519  | -0.17779 |
| H  | -1.67599 | -0.09620 | 1.45260  |
| H  | -1.87096 | -1.58736 | -1.29470 |
| Cl | -1.32270 | -2.75448 | 0.69927  |
| Cl | -4.18985 | -3.12491 | -0.85832 |
| H  | -3.91281 | -1.77353 | 1.06455  |

alphan

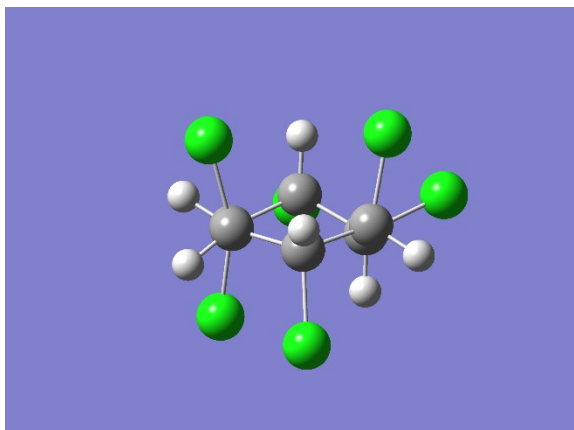

|    |          |          |          |
|----|----------|----------|----------|
| C  | -4.31972 | -0.50873 | -0.65806 |
| C  | -3.90120 | 0.80996  | -0.00570 |
| C  | -2.85753 | 0.57050  | 1.08907  |
| C  | -1.64471 | -0.22040 | 0.58497  |
| C  | -1.94219 | -1.38411 | -0.36935 |
| C  | -3.12316 | -1.19057 | -1.32770 |
| H  | -4.78245 | -1.20037 | 0.09888  |
| Cl | -5.55329 | -0.18950 | -1.90152 |
| H  | -3.49598 | 1.52525  | -0.77355 |
| Cl | -5.32429 | 1.58328  | 0.73363  |
| H  | -2.53141 | 1.55479  | 1.52354  |
| Cl | -3.60409 | -0.33426 | 2.43955  |
| Cl | -0.58440 | 0.94874  | -0.27608 |
| H  | -1.04143 | -0.59161 | 1.45982  |
| H  | -1.01543 | -1.64214 | -0.95385 |
| Cl | -2.31196 | -2.83725 | 0.62274  |
| Cl | -2.57275 | -0.20514 | -2.71541 |
| H  | -3.44300 | -2.17744 | -1.76098 |

betaa

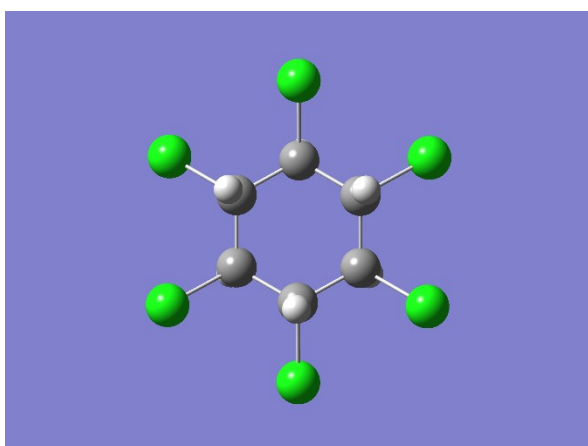

|   |          |          |          |
|---|----------|----------|----------|
| C | -4.46994 | -0.46653 | -0.59565 |
| C | -3.98612 | 0.87811  | -0.03541 |
| C | -2.47512 | 1.06996  | -0.22535 |
| C | -1.67051 | -0.11014 | 0.33677  |
| C | -2.15432 | -1.45478 | -0.22349 |
| C | -3.66532 | -1.64663 | -0.03353 |

|    |          |          |          |
|----|----------|----------|----------|
| Cl | -6.17611 | -0.68296 | -0.11100 |
| H  | -4.44707 | -0.46446 | -1.71736 |
| Cl | -4.82291 | 2.17982  | -0.92877 |
| H  | -4.27108 | 0.98789  | 1.04418  |
| H  | -2.22646 | 1.24593  | -1.30515 |
| Cl | -1.99061 | 2.54088  | 0.66595  |
| Cl | 0.03567  | 0.10629  | -0.14784 |
| H  | -1.69341 | -0.11223 | 1.45848  |
| H  | -1.86938 | -1.56453 | -1.30309 |
| Cl | -1.31752 | -2.75650 | 0.66983  |
| Cl | -4.14983 | -3.11755 | -0.92482 |
| H  | -3.91396 | -1.82259 | 1.04627  |

betab

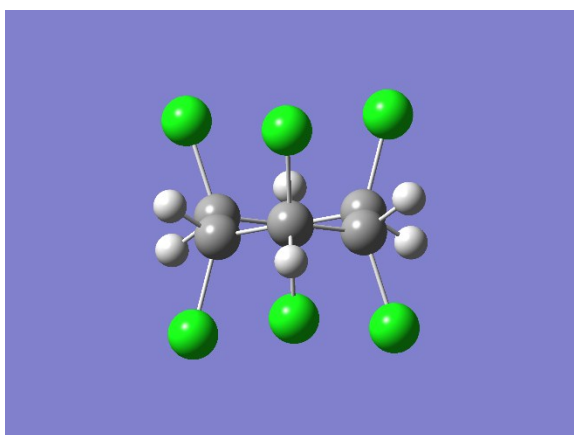

|    |          |          |          |
|----|----------|----------|----------|
| C  | -4.21735 | -0.25486 | 0.85199  |
| C  | -3.82470 | 1.07555  | 0.20731  |
| C  | -2.41983 | 1.18298  | -0.38817 |
| C  | -1.79954 | -0.09047 | -0.96554 |
| C  | -2.19219 | -1.42088 | -0.32087 |
| C  | -3.59706 | -1.52831 | 0.27461  |
| Cl | -3.79058 | -0.17238 | 2.60018  |
| H  | -5.34250 | -0.35337 | 0.84639  |
| Cl | -5.01117 | 1.43046  | -1.10090 |
| H  | -3.97759 | 1.90992  | 0.95308  |
| H  | -2.41060 | 1.99187  | -1.17641 |
| Cl | -1.31875 | 1.80486  | 0.89480  |
| Cl | -2.22631 | -0.17297 | -2.71373 |
| H  | -0.67438 | 0.00804  | -0.95994 |
| H  | -2.03931 | -2.25525 | -1.06664 |
| Cl | -1.00572 | -1.77580 | 0.98735  |
| Cl | -4.69814 | -2.15018 | -1.00836 |
| H  | -3.60629 | -2.33720 | 1.06285  |

deltaa



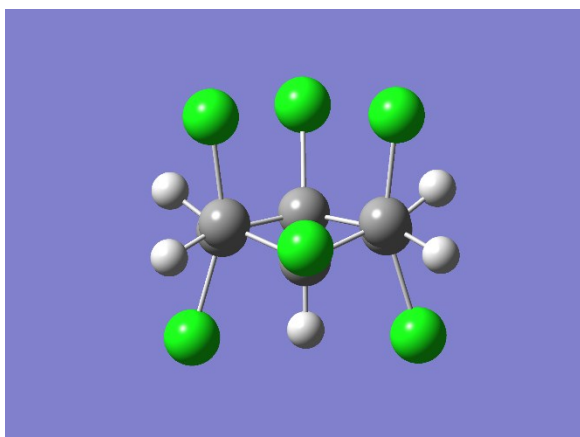

|    |          |         |          |
|----|----------|---------|----------|
| C  | -3.77347 | 3.67626 | -1.21295 |
| C  | -2.51926 | 3.44682 | -0.35950 |
| C  | -2.35708 | 2.07402 | 0.30622  |
| C  | -3.64028 | 1.30383 | 0.63922  |
| C  | -4.67230 | 1.43000 | -0.47923 |
| C  | -5.02473 | 2.86993 | -0.84569 |
| H  | -4.02311 | 4.77345 | -1.24222 |
| Cl | -3.36823 | 3.23190 | -2.91539 |
| H  | -1.60291 | 3.66655 | -0.98211 |
| Cl | -2.48212 | 4.70101 | 0.92865  |
| Cl | -1.41653 | 1.02412 | -0.82206 |
| H  | -1.71916 | 2.16719 | 1.22892  |
| H  | -3.40658 | 0.21432 | 0.80468  |
| Cl | -4.27977 | 1.88434 | 2.19698  |
| H  | -4.26297 | 0.91896 | -1.39985 |
| Cl | -6.15202 | 0.55174 | -0.02591 |
| H  | -5.74940 | 2.86455 | -1.70815 |
| Cl | -5.88265 | 3.69755 | 0.47778  |

deltab

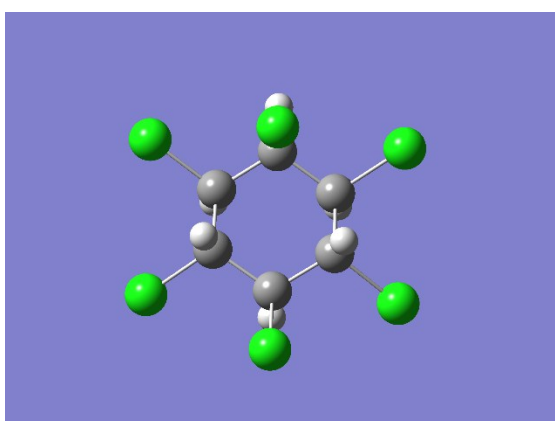

|   |          |         |          |
|---|----------|---------|----------|
| C | -3.64583 | 3.54474 | 0.26997  |
| C | -2.38313 | 2.82655 | -0.23611 |
| C | -2.36700 | 1.32285 | 0.08790  |
| C | -3.68051 | 0.63542 | -0.30646 |
| C | -4.88864 | 1.33872 | 0.32228  |
| C | -4.92815 | 2.80313 | -0.12882 |
| H | -3.60583 | 3.69932 | 1.38236  |

|    |          |          |          |
|----|----------|----------|----------|
| Cl | -3.69545 | 5.16750  | -0.48234 |
| H  | -2.25039 | 2.99324  | -1.33800 |
| Cl | -0.97161 | 3.57289  | 0.57017  |
| Cl | -1.04897 | 0.56939  | -0.85913 |
| H  | -2.13540 | 1.14453  | 1.17301  |
| H  | -3.79202 | 0.59850  | -1.42181 |
| Cl | -3.65672 | -1.05221 | 0.26173  |
| H  | -5.84126 | 0.81247  | 0.05335  |
| Cl | -4.75063 | 1.27248  | 2.10007  |
| H  | -5.09483 | 2.86208  | -1.23632 |
| Cl | -6.32801 | 3.58902  | 0.64206  |

gamma

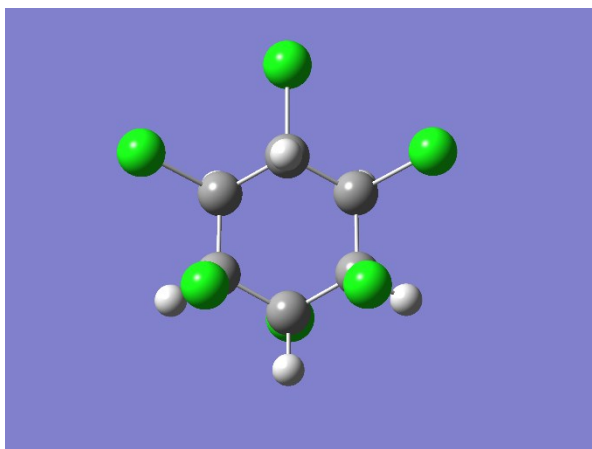

|    |          |          |          |
|----|----------|----------|----------|
| C  | -4.47072 | -0.46666 | -0.54019 |
| C  | -3.97016 | 0.89693  | -0.05321 |
| C  | -2.45666 | 1.05754  | -0.23681 |
| C  | -1.67476 | -0.11073 | 0.37732  |
| C  | -2.13949 | -1.43825 | -0.23514 |
| C  | -3.64508 | -1.66106 | -0.05150 |
| H  | -5.55266 | -0.60398 | -0.27630 |
| Cl | -4.36452 | -0.45436 | -2.33643 |
| H  | -4.50583 | 1.72556  | -0.59003 |
| Cl | -4.38770 | 1.06313  | 1.67255  |
| H  | -2.21722 | 1.16227  | -1.32936 |
| Cl | -1.96064 | 2.57600  | 0.55023  |
| Cl | 0.05409  | 0.10872  | -0.01218 |
| H  | -1.77237 | -0.12239 | 1.49640  |
| H  | -1.88128 | -1.48120 | -1.32759 |
| Cl | -1.27956 | -2.78333 | 0.55381  |
| H  | -3.95637 | -2.59805 | -0.58714 |
| Cl | -4.00807 | -1.92414 | 1.67455  |

porph2

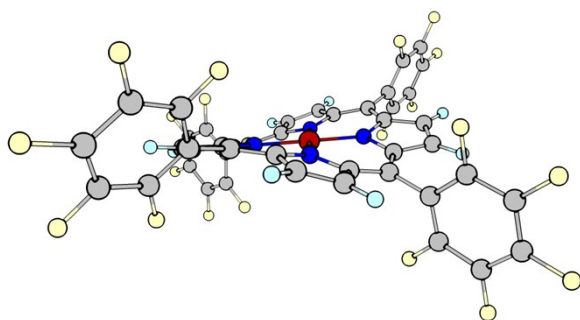

|   |          |          |          |
|---|----------|----------|----------|
| N | 1.12315  | -1.58135 | -1.02433 |
| C | 2.48013  | -1.75699 | -1.38726 |
| C | 2.86410  | -3.13182 | -1.31752 |
| C | 1.75739  | -3.82882 | -0.85667 |
| C | 0.69455  | -2.87374 | -0.69394 |
| C | 2.81972  | 2.86108  | -0.97573 |
| C | 3.63015  | 1.84243  | -1.43015 |
| C | 2.81211  | 0.65629  | -1.47892 |
| N | 1.46871  | 0.93365  | -1.10091 |
| C | 1.48770  | 2.31226  | -0.80547 |
| C | -2.06560 | 3.70257  | -0.82307 |
| C | -0.95495 | 2.74282  | -0.73979 |
| N | -1.38803 | 1.44286  | -1.02476 |
| C | -2.77259 | 1.59454  | -1.29832 |
| C | -3.16658 | 3.00268  | -1.20754 |
| C | -3.95119 | -1.96351 | -1.01470 |
| C | -3.15077 | -0.77573 | -1.16199 |
| N | -1.78015 | -1.04875 | -0.93286 |
| C | -1.76458 | -2.42986 | -0.58851 |
| C | -3.10901 | -2.97593 | -0.61191 |
| C | -3.65550 | 0.52502  | -1.41627 |
| C | 0.37716  | 3.12166  | -0.51371 |
| C | 3.29678  | -0.64639 | -1.70019 |
| C | -0.63440 | -3.22396 | -0.35050 |
| C | 0.63231  | 4.50181  | -0.04792 |
| C | 4.66592  | -0.84014 | -2.17531 |
| C | -0.84162 | -4.58060 | 0.19818  |
| C | -5.06019 | 0.75591  | -1.70640 |
| C | 0.75245  | 5.58447  | -0.94250 |
| C | 0.99588  | 6.89472  | -0.49704 |
| C | 1.12624  | 7.15256  | 0.87487  |
| C | 1.01229  | 6.09569  | 1.78838  |
| C | 0.76822  | 4.79107  | 1.32441  |
| C | -6.10905 | 0.43278  | -0.79196 |
| C | -7.44498 | 0.64253  | -1.07496 |
| C | -7.83583 | 1.21002  | -2.31434 |
| C | -6.81859 | 1.56949  | -3.23740 |
| C | -5.48985 | 1.35388  | -2.93038 |
| C | -1.10153 | -5.69268 | -0.62865 |

|    |          |          |          |
|----|----------|----------|----------|
| C  | -1.28210 | -6.98384 | -0.10453 |
| C  | -1.20424 | -7.19299 | 1.27950  |
| C  | -0.94680 | -6.10665 | 2.12668  |
| C  | -0.76926 | -4.82153 | 1.58482  |
| C  | 5.67130  | -1.42257 | -1.36885 |
| C  | 6.98131  | -1.62438 | -1.83555 |
| C  | 7.33242  | -1.22958 | -3.13534 |
| C  | 6.36359  | -0.63170 | -3.95578 |
| C  | 5.05656  | -0.44392 | -3.47617 |
| H  | 3.82018  | -3.52655 | -1.57373 |
| H  | 1.68147  | -4.87527 | -0.66923 |
| H  | 3.09048  | 3.87880  | -0.79174 |
| H  | 4.66717  | 1.88409  | -1.68219 |
| H  | -1.97063 | 4.74773  | -0.62862 |
| H  | -4.16825 | 3.34351  | -1.39507 |
| H  | -5.00803 | -2.00981 | -1.19941 |
| Fe | -0.15638 | -0.08601 | -1.00605 |
| H  | -3.36320 | -3.98675 | -0.38273 |
| F  | 0.63870  | 5.37065  | -2.24685 |
| F  | 1.10535  | 7.89257  | -1.37005 |
| F  | 1.35784  | 8.38907  | 1.30521  |
| F  | 1.13645  | 6.33329  | 3.09135  |
| F  | 0.66632  | 3.81264  | 2.21333  |
| F  | -5.78085 | -0.03945 | 0.41415  |
| F  | -8.38676 | 0.33265  | -0.17739 |
| F  | -9.12058 | 1.40429  | -2.60308 |
| F  | -7.16831 | 2.11397  | -4.40771 |
| F  | -4.56294 | 1.69071  | -3.83065 |
| F  | -1.17862 | -5.52795 | -1.94280 |
| F  | -1.52523 | -8.01101 | -0.91475 |
| F  | -1.37265 | -8.41202 | 1.78377  |
| F  | -0.87158 | -6.29835 | 3.44117  |
| F  | -0.52805 | -3.81456 | 2.41327  |
| F  | 5.39422  | -1.76748 | -0.11797 |
| F  | 7.89735  | -2.17880 | -1.04587 |
| F  | 8.57048  | -1.41555 | -3.58292 |
| F  | 6.68866  | -0.25063 | -5.18811 |
| F  | 4.16491  | 0.11405  | -4.28450 |
